# Supplementary material for: Patterns of microsatellite distribution across eukaryotic genomes
Source: BMC Genomics. 2019 Feb 22;20:153. doi: 10.1186/s12864-019-5516-5 (PMC6387519; doi:10.1186/s12864-019-5516-5)
Supplement: Supplementary file 3 — Table S2. Table of SSR- and species-wise median lengths of longest repeat instances (XLSX 101 kb) [file 12864_2019_5516_MOESM3_ESM.xlsx]

## Sheet: repeatWise_medianLengths
S.no	Repeat class	Longest length (bp)	Median of 100 longest	Median of 1000 longest	Median of 10000 longest	Longest occurrence organism	ES.no	Kingdom	Group	Subgroup	Subdivision	Common_name
1	A	44544	2770.5	727	172.5	Cercocebus atys	669	Eukaryota	Vertebrates	Mammals	Primates	Sooty mangabey
2	C	14597	4867.5	4098	1798	Diachasma alloeum	489	Eukaryota	Invertebrates	Insects	Insects	NA
3	AC	35597	1795	598	205	Orcinus orca	635	Eukaryota	Vertebrates	Mammals	Cetacea	Killer whale
4	AG	7648	3936	850	262	Citrus sinensis	113	Eukaryota	Plants	Land Plants	Land Plants	NA
5	AT	17324	5131.5	1256.5	311	Tupaia chinensis	702	Eukaryota	Vertebrates	Mammals	Rodentia	Chinese tree shrew
6	CG	2372	105.5	31	25	Alligator sinensis	548	Eukaryota	Vertebrates	Reptiles	Reptiles	Chinese alligator
7	AAC	14707	1447	265.5	80	Microplitis demolitor	488	Eukaryota	Invertebrates	Insects	Insects	NA
8	AAG	29743	2158.5	631	176	Cercocebus atys	669	Eukaryota	Vertebrates	Mammals	Primates	Sooty mangabey
9	AAT	19278	4597.5	935	224	Citrus sinensis	113	Eukaryota	Plants	Land Plants	Land Plants	NA
10	ACC	2542	527	85	51	Cricetulus griseus	692	Eukaryota	Vertebrates	Mammals	Rodentia	Chinese hamster
11	ACG	3432	646.5	116	42	Diachasma alloeum	489	Eukaryota	Invertebrates	Insects	Insects	NA
12	ACT	8041	933.5	238	90	Camponotus floridanus	478	Eukaryota	Invertebrates	Insects	Insects	Carpenter ant
13	AGC	3556	590	185	69	Ficedula albicollis	562	Eukaryota	Vertebrates	Birds	Birds	Collared flycatcher
14	AGG	4778	834.5	265	66	Lupinus angustifolius	122	Eukaryota	Plants	Land Plants	Land Plants	Narrowleaf lupin;Blue lupin
15	ATC	16720	3062.5	410	86	Cicer arietinum	120	Eukaryota	Plants	Land Plants	Land Plants	Chickpea
16	CCG	1214	138.5	57	36	Fukomys damarensis	706	Eukaryota	Vertebrates	Mammals	Rodentia	Damaraland mole-rat
17	AAAC	2847	746	187	55	Cuculus canorus	605	Eukaryota	Vertebrates	Birds	Birds	Common cuckoo
18	AAAG	20279	3209.5	906	221	Cercocebus atys	669	Eukaryota	Vertebrates	Mammals	Primates	Sooty mangabey
19	AAAT	51921	805	401.5	92	Cercocebus atys	669	Eukaryota	Vertebrates	Mammals	Primates	Sooty mangabey
20	AACC	1659	443.5	86	49	Cricetulus griseus	692	Eukaryota	Vertebrates	Mammals	Rodentia	Chinese hamster
21	AACG	4684	256.5	56	29	Harpegnathos saltator	477	Eukaryota	Invertebrates	Insects	Insects	Jerdonâ€™s jumping ant
22	AACT	2271	512	106	46	Ficedula albicollis	562	Eukaryota	Vertebrates	Birds	Birds	Collared flycatcher
23	AAGC	515	130.5	60	32	Harpegnathos saltator	477	Eukaryota	Invertebrates	Insects	Insects	Jerdonâ€™s jumping ant
24	AAGG	27661	2145	856.5	181	Cercocebus atys	669	Eukaryota	Vertebrates	Mammals	Primates	Sooty mangabey
25	AAGT	2477	731.5	142.5	42	Aedes albopictus	406	Eukaryota	Invertebrates	Insects	Insects	Asian tiger musquito
26	AATC	2621	297	129	67	Cyprinus carpio	505	Eukaryota	Vertebrates	Fishes	Fishes	Common carp
27	AATG	5202	713.5	185	65	Odobenus rosmarus divergens	625	Eukaryota	Vertebrates	Mammals	Carnivora	Pacific walrus
28	AATT	780	140.5	55	34	Clupea harengus	504	Eukaryota	Vertebrates	Fishes	Fishes	Atlantic herring
29	ACAG	18595	2564	695	160	Drosophila suzukii	418	Eukaryota	Invertebrates	Insects	Insects	Spotted wing fruit fly
30	ACAT	12623	1213	317.5	104	Gossypium arboreum	108	Eukaryota	Plants	Land Plants	Land Plants	Tree cotton;Cotton
31	ACCC	263	51	32	24	Fukomys damarensis	706	Eukaryota	Vertebrates	Mammals	Rodentia	Damaraland mole-rat
32	ACCG	554	80	39	23	Ceratosolen solmsi marchali	484	Eukaryota	Invertebrates	Insects	Insects	Fig wasp
33	ACCT	3801	439	96	51	Papilio machaon	443	Eukaryota	Invertebrates	Insects	Insects	Old world swallowtail butterfly
34	ACGC	4367	601.5	158	63	Sinocyclocheilus grahami	507	Eukaryota	Vertebrates	Fishes	Fishes	Dianchi golden-line fish
35	ACGG	5766	212	79	39	Cyprinus carpio	505	Eukaryota	Vertebrates	Fishes	Fishes	Common carp
36	ACGT	2141	489.5	71	25	Cyprinus carpio	505	Eukaryota	Vertebrates	Fishes	Fishes	Common carp
37	ACTC	20624	1539.5	205	82	Clupea harengus	504	Eukaryota	Vertebrates	Fishes	Fishes	Atlantic herring
38	ACTG	1923	237	79	38	Cynoglossus semilaevis	545	Eukaryota	Vertebrates	Fishes	Fishes	Tongue sole
39	AGAT	10513	2753.5	786.5	195	Aedes albopictus	406	Eukaryota	Invertebrates	Insects	Insects	Asian tiger musquito
40	AGCC	4042	119	55	31	Picoides pubescens	573	Eukaryota	Vertebrates	Birds	Birds	Downy woodpecker
41	AGCG	829	43	34	25	Sinocyclocheilus grahami	507	Eukaryota	Vertebrates	Fishes	Fishes	Dianchi golden-line fish
42	AGCT	404	61	44	28	Camelus ferus	649	Eukaryota	Vertebrates	Mammals	Ruminantia, Camel family	Wild Bactrian camel;Bactrian camel
43	AGGC	2895	346.5	92	47	Pseudopodoces humilis	565	Eukaryota	Vertebrates	Birds	Birds	Tibetian ground jay
44	AGGG	4718	491	83	54	Panthera tigris altaica	621	Eukaryota	Vertebrates	Mammals	Carnivora	Siberian Tiger
45	ATCC	7711	1544	555.5	111	Cyprinus carpio	505	Eukaryota	Vertebrates	Fishes	Fishes	Common carp
46	ATCG	327	42.5	29	20	Solanum tuberosum	142	Eukaryota	Plants	Land Plants	Land Plants	Potato;Aloo
47	ATGC	515	60	42	27	Cricetulus griseus	692	Eukaryota	Vertebrates	Mammals	Rodentia	Chinese hamster
48	CCCG	145	46.5	29	21	Octodon degus	705	Eukaryota	Vertebrates	Mammals	Rodentia	Degu
49	CCGG	40	27	22	16	Drosophila virilis	437	Eukaryota	Invertebrates	Insects	Insects	NA
50	AAAAC	5081	672.5	179.5	59	Cyprinus carpio	505	Eukaryota	Vertebrates	Fishes	Fishes	Common carp
51	AAAAG	5974	2104.5	823	181	Pygoscelis adeliae	582	Eukaryota	Vertebrates	Birds	Birds	Adelie penguin
52	AAAAT	39497	1016.5	339.5	95	Ceratitis capitata	414	Eukaryota	Invertebrates	Insects	Insects	Mediterranian fruitfly
53	AAACC	1102	344	84	46	Ficedula albicollis	562	Eukaryota	Vertebrates	Birds	Birds	Collared flycatcher
54	AAACG	551	58	32	20	Aedes albopictus	406	Eukaryota	Invertebrates	Insects	Insects	Asian tiger musquito
55	AAACT	829	204	73	28	Acinonyx jubatus	618	Eukaryota	Vertebrates	Mammals	Carnivora	Cheetah;Tanzanian cheetah;Asiatic cheetah
56	AAAGC	1415	686	171	29	Aedes albopictus	406	Eukaryota	Invertebrates	Insects	Insects	Asian tiger musquito
57	AAAGG	9814	1807	666.5	165	Anas platyrhynchos	610	Eukaryota	Vertebrates	Birds	Birds	Mallard
58	AAAGT	667	132	57	21	Larimichthys crocea	533	Eukaryota	Vertebrates	Fishes	Fishes	Large yellow croaker
59	AAATC	1140	135.5	53	28	Cephus cinctus	491	Eukaryota	Invertebrates	Insects	Insects	Wheat stem sawfly
60	AAATG	2654	309.5	71	33	Rhagoletis zephyria	413	Eukaryota	Invertebrates	Insects	Insects	Snow berry friutfly
61	AAATT	5739	300	108	48	Cyprinus carpio	505	Eukaryota	Vertebrates	Fishes	Fishes	Common carp
62	AACAC	3904	243	64	27	Rhagoletis zephyria	413	Eukaryota	Invertebrates	Insects	Insects	Snow berry friutfly
63	AACAG	1746	198.5	65	32	Aedes aegypti	405	Eukaryota	Invertebrates	Insects	Insects	Yellowfever mosquito
64	AACAT	13567	549	98	51	Sinocyclocheilus grahami	507	Eukaryota	Vertebrates	Fishes	Fishes	Dianchi golden-line fish
65	AACCC	929	63.5	39	23	Ficedula albicollis	562	Eukaryota	Vertebrates	Birds	Birds	Collared flycatcher
66	AACCG	4837	39	27	21	Camelina sativa	100	Eukaryota	Plants	Land Plants	Land Plants	Wild flax;Gold of pleasure;German sesame;Siberian oilseed
67	AACCT	1977	358	83	29	Cephus cinctus	491	Eukaryota	Invertebrates	Insects	Insects	Wheat stem sawfly
68	AACGC	588	51	29	17	Pseudopodoces humilis	565	Eukaryota	Vertebrates	Birds	Birds	Tibetian ground jay
69	AACGG	1754	59.5	42	27	Pseudopodoces humilis	565	Eukaryota	Vertebrates	Birds	Birds	Tibetian ground jay
70	AACGT	1150	95	43	19	Nicotiana attenuata	146	Eukaryota	Plants	Land Plants	Land Plants	Coyote tobacco
71	AACTC	3465	418.5	45	22	Rhagoletis zephyria	413	Eukaryota	Invertebrates	Insects	Insects	Snow berry friutfly
72	AACTG	1696	465	77	32	Bos mutus	641	Eukaryota	Vertebrates	Mammals	Ruminantia, Camel family	Domestic yak;Wild yak
73	AACTT	711	88	36	18	Sinocyclocheilus grahami	507	Eukaryota	Vertebrates	Fishes	Fishes	Dianchi golden-line fish
74	AAGAC	810	112	55	22	Acinonyx jubatus	618	Eukaryota	Vertebrates	Mammals	Carnivora	Cheetah;Tanzanian cheetah;Asiatic cheetah
75	AAGAG	11331	2021.5	693	139	Chaetura pelagica	609	Eukaryota	Vertebrates	Birds	Birds	Chimney swift
76	AAGAT	1751	160	93	45	Monopterus albus	537	Eukaryota	Vertebrates	Fishes	Fishes	Asian swamp eel
77	AAGCC	523	74	35	20	Camelus ferus	649	Eukaryota	Vertebrates	Mammals	Ruminantia, Camel family	Wild Bactrian camel;Bactrian camel
78	AAGCG	188	44	21	15	Phalacrocorax carbo	595	Eukaryota	Vertebrates	Birds	Birds	Great cormorant;Cormorant
79	AAGCT	222	60.5	34	23	Larimichthys crocea	533	Eukaryota	Vertebrates	Fishes	Fishes	Large yellow croaker
80	AAGGC	13371	327	84	32	Ochotona princeps	708	Eukaryota	Vertebrates	Mammals	Other	Southern american pika
81	AAGGG	4363	1476	370	98	Anser cygnoides domesticus	611	Eukaryota	Vertebrates	Birds	Birds	Swan Goose;Goose;Domestic Goose
82	AAGGT	727	96.5	49	20	Culex quinquefasciatus	408	Eukaryota	Invertebrates	Insects	Insects	Southern house musquito
83	AAGTC	1137	116.5	34	24	Rhagoletis zephyria	413	Eukaryota	Invertebrates	Insects	Insects	Snow berry friutfly
84	AAGTG	630	124.5	46	25	Culex quinquefasciatus	408	Eukaryota	Invertebrates	Insects	Insects	Southern house musquito
85	AATAC	1742	300	85	43	Solanum tuberosum	142	Eukaryota	Plants	Land Plants	Land Plants	Potato;Aloo
86	AATAG	9044	1173	332.5	92	Diaphorina citri	400	Eukaryota	Invertebrates	Insects	Insects	Asian citrus psyllid
87	AATAT	18099	1130	236.5	96	Geospiza fortis	566	Eukaryota	Vertebrates	Birds	Birds	Medium ground finch
88	AATCC	2971	249	56	23	Ficedula albicollis	562	Eukaryota	Vertebrates	Birds	Birds	Collared flycatcher
89	AATCG	204	49	31	21	Eurypyga helias	589	Eukaryota	Vertebrates	Birds	Birds	Sunbittern
90	AATCT	983	301	79	32	Culex quinquefasciatus	408	Eukaryota	Invertebrates	Insects	Insects	Southern house musquito
91	AATGC	678	84	34	19	Camelus ferus	649	Eukaryota	Vertebrates	Mammals	Ruminantia, Camel family	Wild Bactrian camel;Bactrian camel
92	AATGG	3667	786.5	154	76	Ficedula albicollis	562	Eukaryota	Vertebrates	Birds	Birds	Collared flycatcher
93	AATGT	922	127.5	57	28	Myotis brandtii	653	Eukaryota	Vertebrates	Mammals	Chiroptera	Brandt's bat
94	AATTC	3353	230	74	32	Cyprinus carpio	505	Eukaryota	Vertebrates	Fishes	Fishes	Common carp
95	ACACC	3643	124	63	26	Ficedula albicollis	562	Eukaryota	Vertebrates	Birds	Birds	Collared flycatcher
96	ACACG	512	106	45	19	Columba livia	603	Eukaryota	Vertebrates	Birds	Birds	Rock dove;Domestic pigeon
97	ACACT	4047	98	50	24	Clupea harengus	504	Eukaryota	Vertebrates	Fishes	Fishes	Atlantic herring
98	ACAGC	2171	144	62	27	Ficedula albicollis	562	Eukaryota	Vertebrates	Birds	Birds	Collared flycatcher
99	ACAGG	2318	172	56.5	27	Ficedula albicollis	562	Eukaryota	Vertebrates	Birds	Birds	Collared flycatcher
100	ACAGT	6524	82.5	39	21	Aedes albopictus	406	Eukaryota	Invertebrates	Insects	Insects	Asian tiger musquito
101	ACATC	1226	123	61	22	Ficedula albicollis	562	Eukaryota	Vertebrates	Birds	Birds	Collared flycatcher
102	ACATG	4030	74	39	19	Ficedula albicollis	562	Eukaryota	Vertebrates	Birds	Birds	Collared flycatcher
103	ACCAG	993	78	38	22	Cricetulus griseus	692	Eukaryota	Vertebrates	Mammals	Rodentia	Chinese hamster
104	ACCAT	6597	248	75	28	Nothobranchius furzeri	522	Eukaryota	Vertebrates	Fishes	Fishes	Turquoise killifish
105	ACCCC	1018	67	37	27	Polistes canadensis	482	Eukaryota	Invertebrates	Insects	Insects	Red paper wasp
106	ACCCG	2649	48	29	19	Apteryx australis mantelli	615	Eukaryota	Vertebrates	Birds	Birds	Brown Kiwi
107	ACCCT	815	116	49	21	Anser cygnoides domesticus	611	Eukaryota	Vertebrates	Birds	Birds	Swan Goose;Goose;Domestic Goose
108	ACCGC	766	66	32	18	Pelodiscus sinensis	553	Eukaryota	Vertebrates	Reptiles	Reptiles	Chinese softshell turtle
109	ACCGG	155	36.5	27	18	Charadrius vociferus	586	Eukaryota	Vertebrates	Birds	Birds	Killdeer
110	ACCGT	720	63	28	16	Ficedula albicollis	562	Eukaryota	Vertebrates	Birds	Birds	Collared flycatcher
111	ACCTC	1845	139	51	22	Cyprinus carpio	505	Eukaryota	Vertebrates	Fishes	Fishes	Common carp
112	ACCTG	4085	94	38	23	Eufriesea mexicana	458	Eukaryota	Invertebrates	Insects	Insects	Euglossine bee
113	ACGAG	1829	84	37.5	19	Sinocyclocheilus anshuiensis	506	Eukaryota	Vertebrates	Fishes	Fishes	Eyeless goldenline fish
114	ACGAT	605	64	34	17	Aedes albopictus	406	Eukaryota	Invertebrates	Insects	Insects	Asian tiger musquito
115	ACGCC	203	63.5	33	19	Volvox carteri f. nagariensis	76	Eukaryota	Plants	Green Algae	Green Algae	NA
116	ACGCG	238	43	32	20	Harpegnathos saltator	477	Eukaryota	Invertebrates	Insects	Insects	Jerdonâ€™s jumping ant
117	ACGCT	194	34	19	14	Columba livia	603	Eukaryota	Vertebrates	Birds	Birds	Rock dove;Domestic pigeon
118	ACGGC	4113	69	34	19	Falco cherrug	601	Eukaryota	Vertebrates	Birds	Birds	Saker falcon
119	ACGGG	1323	64	39	23	Calypte anna	608	Eukaryota	Vertebrates	Birds	Birds	Anna's hummingbird
120	ACGTC	352	51	26	15.5	Anser cygnoides domesticus	611	Eukaryota	Vertebrates	Birds	Birds	Swan Goose;Goose;Domestic Goose
121	ACTAG	2802	1021	165.5	28	Aedes albopictus	406	Eukaryota	Invertebrates	Insects	Insects	Asian tiger musquito
122	ACTAT	1792	262	95.5	45	Megachile rotundata	495	Eukaryota	Invertebrates	Insects	Insects	Alfa alfa leafcutting bee
123	ACTCC	1032	132	56	33	Ficedula albicollis	562	Eukaryota	Vertebrates	Birds	Birds	Collared flycatcher
124	ACTCG	146	46.5	28	18	Antrostomus carolinensis	607	Eukaryota	Vertebrates	Birds	Birds	Chuck-will's-widow
125	ACTCT	2496	460.5	114	53	Cyprinus carpio	505	Eukaryota	Vertebrates	Fishes	Fishes	Common carp
126	ACTGC	457	48	29	19	Gavialis gangeticus	550	Eukaryota	Vertebrates	Reptiles	Reptiles	Indian gharial
127	ACTGG	232	55	33	20	Clupea harengus	504	Eukaryota	Vertebrates	Fishes	Fishes	Atlantic herring
128	AGAGC	2830	752.5	97	28	Aedes albopictus	406	Eukaryota	Invertebrates	Insects	Insects	Asian tiger musquito
129	AGAGG	6377	1538.5	509.5	101	Cyprinus carpio	505	Eukaryota	Vertebrates	Fishes	Fishes	Common carp
130	AGATC	696	72.5	34	25	Beta vulgaris subsp. vulgaris	138	Eukaryota	Plants	Land Plants	Land Plants	NA
131	AGATG	4167	500	84	28	Aedes albopictus	406	Eukaryota	Invertebrates	Insects	Insects	Asian tiger musquito
132	AGCAT	933	255.5	79	29	Aedes albopictus	406	Eukaryota	Invertebrates	Insects	Insects	Asian tiger musquito
133	AGCCC	851	88.5	47	29	Balaenoptera acutorostrata scammoni	633	Eukaryota	Vertebrates	Mammals	Cetacea	Minke Whale
134	AGCCG	546	142	42	22	Ficedula albicollis	562	Eukaryota	Vertebrates	Birds	Birds	Collared flycatcher
135	AGCCT	933	73	32.5	18	Picoides pubescens	573	Eukaryota	Vertebrates	Birds	Birds	Downy woodpecker
136	AGCGC	188	36	24	17	Pelodiscus sinensis	553	Eukaryota	Vertebrates	Reptiles	Reptiles	Chinese softshell turtle
137	AGCGG	159	34	25	18	Myotis brandtii	653	Eukaryota	Vertebrates	Mammals	Chiroptera	Brandt's bat
138	AGCTC	3629	71.5	37	23	Myotis brandtii	653	Eukaryota	Vertebrates	Mammals	Chiroptera	Brandt's bat
139	AGGAT	3039	580.5	169	59	Sinocyclocheilus grahami	507	Eukaryota	Vertebrates	Fishes	Fishes	Dianchi golden-line fish
140	AGGCC	613	49.5	32	22	Anser cygnoides domesticus	611	Eukaryota	Vertebrates	Birds	Birds	Swan Goose;Goose;Domestic Goose
141	AGGCG	779	73.5	36	22	Falco peregrinus	602	Eukaryota	Vertebrates	Birds	Birds	Peregrine falcon;Peale's falcon
142	AGGGC	1302	142	55	30	Ficedula albicollis	562	Eukaryota	Vertebrates	Birds	Birds	Collared flycatcher
143	AGGGG	1085	124	73	36	Ficedula albicollis	562	Eukaryota	Vertebrates	Birds	Birds	Collared flycatcher
144	ATATC	7046	464	79.5	40	Cyprinus carpio	505	Eukaryota	Vertebrates	Fishes	Fishes	Common carp
145	ATCCC	6942	1427.5	364	59	Corvus cornix cornix	561	Eukaryota	Vertebrates	Birds	Birds	Hooded crow
146	ATCCG	79	34	24	17	Serinus canaria	568	Eukaryota	Vertebrates	Birds	Birds	Atlantic canary;Island canary
147	ATCGC	723	58	30	18	Ficedula albicollis	562	Eukaryota	Vertebrates	Birds	Birds	Collared flycatcher
148	ATGCC	1244	127.5	48	22	Calypte anna	608	Eukaryota	Vertebrates	Birds	Birds	Anna's hummingbird
149	CCCCG	446	66	36	25	Pseudopodoces humilis	565	Eukaryota	Vertebrates	Birds	Birds	Tibetian ground jay
150	CCCGG	478	43	33	24	Corvus brachyrhynchos	560	Eukaryota	Vertebrates	Birds	Birds	American crow
151	CCGCG	116	39	30	22	Lipotes vexillifer	634	Eukaryota	Vertebrates	Mammals	Cetacea	Yangtze river dolphin
152	AAAAAC	1156	582	130	41	Culex quinquefasciatus	408	Eukaryota	Invertebrates	Insects	Insects	Southern house musquito
153	AAAAAG	7845	1267.5	458.5	89	Tupaia chinensis	702	Eukaryota	Vertebrates	Mammals	Rodentia	Chinese tree shrew
154	AAAAAT	3065	242	87	37	Cicer arietinum	120	Eukaryota	Plants	Land Plants	Land Plants	Chickpea
155	AAAACC	1199	282.5	52	28	Culex quinquefasciatus	408	Eukaryota	Invertebrates	Insects	Insects	Southern house musquito
156	AAAACG	257	39.5	24	17	Mus musculus	696	Eukaryota	Vertebrates	Mammals	Rodentia	House mouse
157	AAAACT	920	90.5	30	21	Drosophila eugracilis	420	Eukaryota	Invertebrates	Insects	Insects	NA
158	AAAAGC	1054	140.5	30	21	Culex quinquefasciatus	408	Eukaryota	Invertebrates	Insects	Insects	Southern house musquito
159	AAAAGG	11831	1039	245	52.5	Corvus brachyrhynchos	560	Eukaryota	Vertebrates	Birds	Birds	American crow
160	AAAAGT	712	64	27	19	Amyelois transitella	446	Eukaryota	Invertebrates	Insects	Insects	Navel orangeworm moth
161	AAAATC	882	99.5	34	22	Gossypium hirsutum	109	Eukaryota	Plants	Land Plants	Land Plants	Upland cotton;Mexican cotton
162	AAAATG	857	78	35	23	Anser cygnoides domesticus	611	Eukaryota	Vertebrates	Birds	Birds	Swan Goose;Goose;Domestic Goose
163	AAAATT	14379	558	204	56	Ceratitis capitata	414	Eukaryota	Invertebrates	Insects	Insects	Mediterranian fruitfly
164	AAACAC	1543	70.5	35	23	Drosophila suzukii	418	Eukaryota	Invertebrates	Insects	Insects	Spotted wing fruit fly
165	AAACAG	1018	75	29	21	Aedes albopictus	406	Eukaryota	Invertebrates	Insects	Insects	Asian tiger musquito
166	AAACAT	4205	83	32	21	Rhagoletis zephyria	413	Eukaryota	Invertebrates	Insects	Insects	Snow berry friutfly
167	AAACCC	1025	301.5	41	21	Ficedula albicollis	562	Eukaryota	Vertebrates	Birds	Birds	Collared flycatcher
168	AAACCG	247	35	25	18	Blastocystis hominis	63	Eukaryota	Protists	Other Protists	Other Protists	NA
169	AAACCT	341	79.5	44	22	Camelina sativa	100	Eukaryota	Plants	Land Plants	Land Plants	Wild flax;Gold of pleasure;German sesame;Siberian oilseed
170	AAACGC	573	32	22	15	Ceratosolen solmsi marchali	484	Eukaryota	Invertebrates	Insects	Insects	Fig wasp
171	AAACGG	1223	30	22	16	Anser cygnoides domesticus	611	Eukaryota	Vertebrates	Birds	Birds	Swan Goose;Goose;Domestic Goose
172	AAACGT	254	41	22	17	Nicotiana attenuata	146	Eukaryota	Plants	Land Plants	Land Plants	Coyote tobacco
173	AAACTC	729	38	26	18	Bombus impatiens	459	Eukaryota	Invertebrates	Insects	Insects	Bumblebee
174	AAACTG	286	33	25	18	Culex quinquefasciatus	408	Eukaryota	Invertebrates	Insects	Insects	Southern house musquito
175	AAACTT	828	77	25	17	Gossypium hirsutum	109	Eukaryota	Plants	Land Plants	Land Plants	Upland cotton;Mexican cotton
176	AAAGAC	3106	90.5	30	19	Rhagoletis zephyria	413	Eukaryota	Invertebrates	Insects	Insects	Snow berry friutfly
177	AAAGAG	2705	908.5	195	50	Anser cygnoides domesticus	611	Eukaryota	Vertebrates	Birds	Birds	Swan Goose;Goose;Domestic Goose
178	AAAGAT	1521	205.5	61	20	Nipponia nippon	593	Eukaryota	Vertebrates	Birds	Birds	Crested ibis
179	AAAGCC	1286	97	30	20	Aedes aegypti	405	Eukaryota	Invertebrates	Insects	Insects	Yellowfever mosquito
180	AAAGCG	95	29	20	15	Pelecanus crispus	594	Eukaryota	Vertebrates	Birds	Birds	Dalmatian pelican
181	AAAGCT	97	29.5	21	17	Cynoglossus semilaevis	545	Eukaryota	Vertebrates	Fishes	Fishes	Tongue sole
182	AAAGGC	1225	264.5	39	19	Aedes albopictus	406	Eukaryota	Invertebrates	Insects	Insects	Asian tiger musquito
183	AAAGGG	4943	1135	214.5	50	Anser cygnoides domesticus	611	Eukaryota	Vertebrates	Birds	Birds	Swan Goose;Goose;Domestic Goose
184	AAAGGT	735	101	26	20	Ficedula albicollis	562	Eukaryota	Vertebrates	Birds	Birds	Collared flycatcher
185	AAAGTC	431	37	26	19	Megachile rotundata	495	Eukaryota	Invertebrates	Insects	Insects	Alfa alfa leafcutting bee
186	AAAGTG	506	40	28	22	Anser cygnoides domesticus	611	Eukaryota	Vertebrates	Birds	Birds	Swan Goose;Goose;Domestic Goose
187	AAAGTT	4347	92.5	24	17	Aedes albopictus	406	Eukaryota	Invertebrates	Insects	Insects	Asian tiger musquito
188	AAATAC	985	133.5	39	22	Drosophila willistoni	433	Eukaryota	Invertebrates	Insects	Insects	NA
189	AAATAG	4234	395	81	23	Picoides pubescens	573	Eukaryota	Vertebrates	Birds	Birds	Downy woodpecker
190	AAATAT	9940	602	128.5	46	Drosophila busckii	439	Eukaryota	Invertebrates	Insects	Insects	NA
191	AAATCC	757	66	35	22	Culex quinquefasciatus	408	Eukaryota	Invertebrates	Insects	Insects	Southern house musquito
192	AAATCG	401	35	25	18	Culex quinquefasciatus	408	Eukaryota	Invertebrates	Insects	Insects	Southern house musquito
193	AAATCT	761	82.5	32	20	Ficedula albicollis	562	Eukaryota	Vertebrates	Birds	Birds	Collared flycatcher
194	AAATGC	182	36	25	18	Cajanus cajan	115	Eukaryota	Plants	Land Plants	Land Plants	Pegion pea
195	AAATGG	839	78.5	31	20	Merops nubicus	577	Eukaryota	Vertebrates	Birds	Birds	Northern carmine bee-eater
196	AAATGT	814	66.5	31	23	Clupea harengus	504	Eukaryota	Vertebrates	Fishes	Fishes	Atlantic herring
197	AAATTC	4340	145	35	23	Aedes albopictus	406	Eukaryota	Invertebrates	Insects	Insects	Asian tiger musquito
198	AAATTG	1204	100	29	20	Aedes albopictus	406	Eukaryota	Invertebrates	Insects	Insects	Asian tiger musquito
199	AAATTT	653	59.5	29	22	Ficedula albicollis	562	Eukaryota	Vertebrates	Birds	Birds	Collared flycatcher
200	AACAAG	4248	301.5	65	24	Tupaia chinensis	702	Eukaryota	Vertebrates	Mammals	Rodentia	Chinese tree shrew
201	AACAAT	9018	376	77	29	Capsicum annuum	139	Eukaryota	Plants	Land Plants	Land Plants	Sweet and chili peppers;Capsicum
202	AACACC	7694	82	36	22	Diaphorina citri	400	Eukaryota	Invertebrates	Insects	Insects	Asian citrus psyllid
203	AACACG	161	33	22	15	Sphaeroforma arctica JP610	35	Eukaryota	Protists	Other Protists	Other Protists	NA
204	AACACT	478	65	29	20	Bombus impatiens	459	Eukaryota	Invertebrates	Insects	Insects	Bumblebee
205	AACAGC	1406	145.5	50	28	Bombus impatiens	459	Eukaryota	Invertebrates	Insects	Insects	Bumblebee
206	AACAGG	467	82.5	29	17	Culex quinquefasciatus	408	Eukaryota	Invertebrates	Insects	Insects	Southern house musquito
207	AACAGT	847	90	30	19	Aedes albopictus	406	Eukaryota	Invertebrates	Insects	Insects	Asian tiger musquito
208	AACATC	346	77	30.5	20	Culex quinquefasciatus	408	Eukaryota	Invertebrates	Insects	Insects	Southern house musquito
209	AACATG	1300	65	31	18	Rhagoletis zephyria	413	Eukaryota	Invertebrates	Insects	Insects	Snow berry friutfly
210	AACATT	873	115.5	29	18	Ficedula albicollis	562	Eukaryota	Vertebrates	Birds	Birds	Collared flycatcher
211	AACCAC	220	68	31	20	Endocarpon pusillum Z07020	198	Eukaryota	Fungi	Ascomycetes	Ascomycetes	NA
212	AACCAG	1393	74	35	23	Culex quinquefasciatus	408	Eukaryota	Invertebrates	Insects	Insects	Southern house musquito
213	AACCAT	370	58	29	18	Ficedula albicollis	562	Eukaryota	Vertebrates	Birds	Birds	Collared flycatcher
214	AACCCC	208	49	32	21	Ananas comosus	93	Eukaryota	Plants	Land Plants	Land Plants	NA
215	AACCCG	501	47	29	19	Ficedula albicollis	562	Eukaryota	Vertebrates	Birds	Birds	Collared flycatcher
216	AACCCT	15007	1485	407.5	105	Rhincodon typus	503	Eukaryota	Vertebrates	Fishes	Fishes	Whale shark
217	AACCGC	144	36.5	23	16	Drosophila elegans	421	Eukaryota	Invertebrates	Insects	Insects	NA
218	AACCGG	64	33	23	17	Rattus norvegicus	697	Eukaryota	Vertebrates	Mammals	Rodentia	Brown rat;Rat
219	AACCGT	140	38	22	15	Monomorium pharaonis	474	Eukaryota	Invertebrates	Insects	Insects	Pharaoh ant
220	AACCTC	140	59	25	17	Bactrocera oleae	412	Eukaryota	Invertebrates	Insects	Insects	Olive fruit fly
221	AACCTG	597	52	27	17	Culex quinquefasciatus	408	Eukaryota	Invertebrates	Insects	Insects	Southern house musquito
222	AACCTT	510	75.5	25	17	Acinonyx jubatus	618	Eukaryota	Vertebrates	Mammals	Carnivora	Cheetah;Tanzanian cheetah;Asiatic cheetah
223	AACGAC	875	72	32.5	20	Ceratosolen solmsi marchali	484	Eukaryota	Invertebrates	Insects	Insects	Fig wasp
224	AACGAG	575	43	23	16	Bombus impatiens	459	Eukaryota	Invertebrates	Insects	Insects	Bumblebee
225	AACGAT	770	42	23	16	Ceratosolen solmsi marchali	484	Eukaryota	Invertebrates	Insects	Insects	Fig wasp
226	AACGCC	94	39	24	16	Ceratosolen solmsi marchali	484	Eukaryota	Invertebrates	Insects	Insects	Fig wasp
227	AACGCG	110	33	22	15	Ictalurus punctatus	510	Eukaryota	Vertebrates	Fishes	Fishes	Channel catfish
228	AACGCT	103	47	26	15	Aedes aegypti	405	Eukaryota	Invertebrates	Insects	Insects	Yellowfever mosquito
229	AACGGC	575	48	29	19	Ceratosolen solmsi marchali	484	Eukaryota	Invertebrates	Insects	Insects	Fig wasp
230	AACGGG	590	41	25	16	Ceratosolen solmsi marchali	484	Eukaryota	Invertebrates	Insects	Insects	Fig wasp
231	AACGGT	139	40	22	15	Acyrthosiphon pisum	397	Eukaryota	Invertebrates	Insects	Insects	Pea aphid
232	AACGTC	440	28.5	21	15	Culex quinquefasciatus	408	Eukaryota	Invertebrates	Insects	Insects	Southern house musquito
233	AACGTG	409	32	21	15	Cephus cinctus	491	Eukaryota	Invertebrates	Insects	Insects	Wheat stem sawfly
234	AACGTT	197	50.5	20	14	Pan paniscus	681	Eukaryota	Vertebrates	Mammals	Primates	Pygmy chimpanzee
235	AACTAC	612	79.5	29	18	Culex quinquefasciatus	408	Eukaryota	Invertebrates	Insects	Insects	Southern house musquito
236	AACTAG	800	58.5	26	20	Aedes albopictus	406	Eukaryota	Invertebrates	Insects	Insects	Asian tiger musquito
237	AACTAT	3726	97.5	34	18	Drosophila suzukii	418	Eukaryota	Invertebrates	Insects	Insects	Spotted wing fruit fly
238	AACTCC	273	44	26	18	Culex quinquefasciatus	408	Eukaryota	Invertebrates	Insects	Insects	Southern house musquito
239	AACTCG	63	33.5	22	16	Nicotiana tomentosiformis	145	Eukaryota	Plants	Land Plants	Land Plants	NA
240	AACTCT	731	88.5	28	17	Ficedula albicollis	562	Eukaryota	Vertebrates	Birds	Birds	Collared flycatcher
241	AACTGC	137	38	27	19	Alligator mississippiensis	547	Eukaryota	Vertebrates	Reptiles	Reptiles	American alligator
242	AACTGG	465	41	24	17	Ficedula albicollis	562	Eukaryota	Vertebrates	Birds	Birds	Collared flycatcher
243	AACTGT	116	39	24	17	Aethina tumida	449	Eukaryota	Invertebrates	Insects	Insects	Small hive beetle
244	AACTTC	5485	44.5	25	18	Habropoda laboriosa	462	Eukaryota	Invertebrates	Insects	Insects	Southeastern blueberry bee
245	AACTTG	628	55.5	35	23	Solanum tuberosum	142	Eukaryota	Plants	Land Plants	Land Plants	Potato;Aloo
246	AAGAAT	5766	418	81	23	Cyprinus carpio	505	Eukaryota	Vertebrates	Fishes	Fishes	Common carp
247	AAGACC	666	96	44	23	Aedes albopictus	406	Eukaryota	Invertebrates	Insects	Insects	Asian tiger musquito
248	AAGACG	827	70	35	20	Gekko japonicus	558	Eukaryota	Vertebrates	Reptiles	Reptiles	Gekko;Schlegelâ€™s Japanese Gecko
249	AAGACT	245	61.5	30	18	Drosophila melanogaster	425	Eukaryota	Invertebrates	Insects	Insects	Fruitfly
250	AAGAGC	818	95	31	20	Aedes albopictus	406	Eukaryota	Invertebrates	Insects	Insects	Asian tiger musquito
251	AAGAGG	4637	659	101	41	Lupinus angustifolius	122	Eukaryota	Plants	Land Plants	Land Plants	Narrowleaf lupin;Blue lupin
252	AAGAGT	695	102.5	23	16	Ficedula albicollis	562	Eukaryota	Vertebrates	Birds	Birds	Collared flycatcher
253	AAGATC	4121	41	24	17	Rhagoletis zephyria	413	Eukaryota	Invertebrates	Insects	Insects	Snow berry friutfly
254	AAGATG	1142	137.5	83	25	Gallus gallus	613	Eukaryota	Vertebrates	Birds	Birds	Red junglefowl;Junglefowl;Chicken
255	AAGATT	461	50	26	18	Ficedula albicollis	562	Eukaryota	Vertebrates	Birds	Birds	Collared flycatcher
256	AAGCAC	245	56.5	26	17	Culex quinquefasciatus	408	Eukaryota	Invertebrates	Insects	Insects	Southern house musquito
257	AAGCAG	1203	192	58	27	Aedes albopictus	406	Eukaryota	Invertebrates	Insects	Insects	Asian tiger musquito
258	AAGCAT	294	40	27	17	Culex quinquefasciatus	408	Eukaryota	Invertebrates	Insects	Insects	Southern house musquito
259	AAGCCC	6216	74	30	19	Brassica napus	102	Eukaryota	Plants	Land Plants	Land Plants	Rapeseed;Oilseed rape;Rapa;Rappi
260	AAGCCG	2043	64	34	20	Solanum pennellii	141	Eukaryota	Plants	Land Plants	Land Plants	Wild tomato
261	AAGCCT	432	90.5	29	17	Caenorhabditis elegans	393	Eukaryota	Invertebrates	Roundworms	Roundworms	NA
262	AAGCGC	98	24	18	14	Cricetulus griseus	692	Eukaryota	Vertebrates	Mammals	Rodentia	Chinese hamster
263	AAGCGG	123	35	22	16	Raphanus sativus	105	Eukaryota	Plants	Land Plants	Land Plants	Radish;Moolee
264	AAGCGT	60	21	16	13	Marssonina brunnea f. sp. 'multigermtubi' MB_m1	228	Eukaryota	Fungi	Ascomycetes	Ascomycetes	NA
265	AAGCTC	90	43	28	19	Melampsora larici-populina 98AG31	368	Eukaryota	Fungi	Basidiomycetes	Basidiomycetes	NA
266	AAGCTG	331	36	27	21	Panthera pardus	620	Eukaryota	Vertebrates	Mammals	Carnivora	Leopard;Indian leopard;African leopard
267	AAGCTT	64	22	17	15	Thamnophis sirtalis	556	Eukaryota	Vertebrates	Reptiles	Reptiles	Common garter snake;Eastern garter snake
268	AAGGAC	959	70	29	18	Ficedula albicollis	562	Eukaryota	Vertebrates	Birds	Birds	Collared flycatcher
269	AAGGAG	9131	1159	315	93	Myotis brandtii	653	Eukaryota	Vertebrates	Mammals	Chiroptera	Brandt's bat
270	AAGGAT	1370	109	36	17	Ficedula albicollis	562	Eukaryota	Vertebrates	Birds	Birds	Collared flycatcher
271	AAGGCC	227	35	26	18	Ziziphus jujuba	130	Eukaryota	Plants	Land Plants	Land Plants	Jujube;Red date;Chinese data;Korean date;Indian date
272	AAGGCG	1249	45	24	16	Bombus impatiens	459	Eukaryota	Invertebrates	Insects	Insects	Bumblebee
273	AAGGCT	3809	111	24	16	Sinocyclocheilus grahami	507	Eukaryota	Vertebrates	Fishes	Fishes	Dianchi golden-line fish
274	AAGGGC	830	83	33	19	Anser cygnoides domesticus	611	Eukaryota	Vertebrates	Birds	Birds	Swan Goose;Goose;Domestic Goose
275	AAGGGG	1346	138	56	30	Anser cygnoides domesticus	611	Eukaryota	Vertebrates	Birds	Birds	Swan Goose;Goose;Domestic Goose
276	AAGGGT	2358	72.5	24	16	Ficedula albicollis	562	Eukaryota	Vertebrates	Birds	Birds	Collared flycatcher
277	AAGGTC	796	47	29	20	Gossypium hirsutum	109	Eukaryota	Plants	Land Plants	Land Plants	Upland cotton;Mexican cotton
278	AAGGTG	503	59	28.5	18	Cucumis sativus	132	Eukaryota	Plants	Land Plants	Land Plants	Cucumber
279	AAGTAC	547	39	22	16	Drosophila erecta	423	Eukaryota	Invertebrates	Insects	Insects	NA
280	AAGTAG	884	153	35	18	Ursus maritimus	623	Eukaryota	Vertebrates	Mammals	Carnivora	Polar bear
281	AAGTAT	890	180	35	17	Ficedula albicollis	562	Eukaryota	Vertebrates	Birds	Birds	Collared flycatcher
282	AAGTCC	908	137	26	17	Aedes aegypti	405	Eukaryota	Invertebrates	Insects	Insects	Yellowfever mosquito
283	AAGTCG	612	31	22	16	Bombus impatiens	459	Eukaryota	Invertebrates	Insects	Insects	Bumblebee
284	AAGTCT	305	59.5	27	17	Caenorhabditis elegans	393	Eukaryota	Invertebrates	Roundworms	Roundworms	NA
285	AAGTGC	209	34	22	16	Culex quinquefasciatus	408	Eukaryota	Invertebrates	Insects	Insects	Southern house musquito
286	AAGTGG	130	42	26	18	Sordaria macrospora	273	Eukaryota	Fungi	Ascomycetes	Ascomycetes	NA
287	AAGTGT	184	38	22	16	Clupea harengus	504	Eukaryota	Vertebrates	Fishes	Fishes	Atlantic herring
288	AATACC	904	92.5	33	18	Pteropus alecto	659	Eukaryota	Vertebrates	Mammals	Chiroptera	Black flying fox
289	AATACG	131	50.5	24	16	Apaloderma vittatum	572	Eukaryota	Vertebrates	Birds	Birds	Bar-tailed trogon
290	AATACT	1561	477.5	97	28	Diaphorina citri	400	Eukaryota	Invertebrates	Insects	Insects	Asian citrus psyllid
291	AATAGC	2406	91.5	35	23	Lupinus angustifolius	122	Eukaryota	Plants	Land Plants	Land Plants	Narrowleaf lupin;Blue lupin
292	AATAGG	1962	348	77	19	Aedes albopictus	406	Eukaryota	Invertebrates	Insects	Insects	Asian tiger musquito
293	AATAGT	1841	370	80	28	Cicer arietinum	120	Eukaryota	Plants	Land Plants	Land Plants	Chickpea
294	AATATC	2384	97.5	33	19	Megachile rotundata	495	Eukaryota	Invertebrates	Insects	Insects	Alfa alfa leafcutting bee
295	AATATG	607	141.5	37	20	Anopheles gambiae str. PEST	407	Eukaryota	Invertebrates	Insects	Insects	NA
296	AATATT	623	61.5	32	22	Ficedula albicollis	562	Eukaryota	Vertebrates	Birds	Birds	Collared flycatcher
297	AATCAC	239	51	27	18	Solanum tuberosum	142	Eukaryota	Plants	Land Plants	Land Plants	Potato;Aloo
298	AATCAG	1704	111	39	26	Aedes albopictus	406	Eukaryota	Invertebrates	Insects	Insects	Asian tiger musquito
299	AATCAT	852	83.5	35	22	Pteropus alecto	659	Eukaryota	Vertebrates	Mammals	Chiroptera	Black flying fox
300	AATCCC	1830	169.5	36	20	Aedes aegypti	405	Eukaryota	Invertebrates	Insects	Insects	Yellowfever mosquito
301	AATCCG	139	47	27	17	Solanum tuberosum	142	Eukaryota	Plants	Land Plants	Land Plants	Potato;Aloo
302	AATCCT	720	96	64	28	Ficedula albicollis	562	Eukaryota	Vertebrates	Birds	Birds	Collared flycatcher
303	AATCGC	233	31	21	15	Aedes aegypti	405	Eukaryota	Invertebrates	Insects	Insects	Yellowfever mosquito
304	AATCGG	85	35	24	17	Lepisosteus oculatus	543	Eukaryota	Vertebrates	Fishes	Fishes	Spotted gar
305	AATCGT	1661	33	20	15	Megachile rotundata	495	Eukaryota	Invertebrates	Insects	Insects	Alfa alfa leafcutting bee
306	AATCTC	599	116.5	29	18	Rhagoletis zephyria	413	Eukaryota	Invertebrates	Insects	Insects	Snow berry friutfly
307	AATCTG	2234	59	28	19	Aedes aegypti	405	Eukaryota	Invertebrates	Insects	Insects	Yellowfever mosquito
308	AATGAC	857	163.5	47	19	Megachile rotundata	495	Eukaryota	Invertebrates	Insects	Insects	Alfa alfa leafcutting bee
309	AATGAG	816	75.5	33	19	Trachymyrmex septentrionalis	468	Eukaryota	Invertebrates	Insects	Insects	NA
310	AATGAT	3054	211.5	62	26	Rhagoletis zephyria	413	Eukaryota	Invertebrates	Insects	Insects	Snow berry friutfly
311	AATGCC	107	36	25	17	Monoraphidium neglectum	77	Eukaryota	Plants	Green Algae	Green Algae	NA
312	AATGCG	77	35	25	18	Aethina tumida	449	Eukaryota	Invertebrates	Insects	Insects	Small hive beetle
313	AATGCT	659	57	31	21	Ficedula albicollis	562	Eukaryota	Vertebrates	Birds	Birds	Collared flycatcher
314	AATGGC	242	47.5	27	18	Ficedula albicollis	562	Eukaryota	Vertebrates	Birds	Birds	Collared flycatcher
315	AATGGG	4562	339.5	45	22	Ficedula albicollis	562	Eukaryota	Vertebrates	Birds	Birds	Collared flycatcher
316	AATGGT	366	59	27	18	Ficedula albicollis	562	Eukaryota	Vertebrates	Birds	Birds	Collared flycatcher
317	AATGTC	367	35	23	17	Plutella xylostella	447	Eukaryota	Invertebrates	Insects	Insects	Diamondback moth
318	AATGTG	809	54.5	27	18	Acinonyx jubatus	618	Eukaryota	Vertebrates	Mammals	Carnivora	Cheetah;Tanzanian cheetah;Asiatic cheetah
319	AATTAC	1025	190	29	19	Culex quinquefasciatus	408	Eukaryota	Invertebrates	Insects	Insects	Southern house musquito
320	AATTAG	2759	123.5	41	20	Ficedula albicollis	562	Eukaryota	Vertebrates	Birds	Birds	Collared flycatcher
321	AATTAT	498	51	30	21	Sinocyclocheilus rhinocerous	508	Eukaryota	Vertebrates	Fishes	Fishes	Indian rhinoceros
322	AATTCC	900	55.5	27	18	Ficedula albicollis	562	Eukaryota	Vertebrates	Birds	Birds	Collared flycatcher
323	AATTCG	42	24.5	19	15	Thamnophis sirtalis	556	Eukaryota	Vertebrates	Reptiles	Reptiles	Common garter snake;Eastern garter snake
324	AATTGC	34	26	20	16	Ipomoea nil	147	Eukaryota	Plants	Land Plants	Land Plants	Picotee morning glory;Ivy morning glory;Japonese morning glory
325	ACACAG	21170	556	110	37	Clupea harengus	504	Eukaryota	Vertebrates	Fishes	Fishes	Atlantic herring
326	ACACAT	9474	359.5	87	35	Brassica napus	102	Eukaryota	Plants	Land Plants	Land Plants	Rapeseed;Oilseed rape;Rapa;Rappi
327	ACACCC	1029	105.5	45	27	Clupea harengus	504	Eukaryota	Vertebrates	Fishes	Fishes	Atlantic herring
328	ACACCG	479	42	24	16	Bombus impatiens	459	Eukaryota	Invertebrates	Insects	Insects	Bumblebee
329	ACACCT	231	61.5	27	17	Setosphaeria turcica Et28A	178	Eukaryota	Fungi	Ascomycetes	Ascomycetes	NA
330	ACACGC	4853	395	101	42	Clupea harengus	504	Eukaryota	Vertebrates	Fishes	Fishes	Atlantic herring
331	ACACGG	1930	66	29	17	Calidris pugnax	585	Eukaryota	Vertebrates	Birds	Birds	Ruff
332	ACACGT	366	58	26	16	Carlito syrichta	685	Eukaryota	Vertebrates	Mammals	Primates	Philippine tarsier;Tarsier
333	ACACTC	4769	271	59	29	Sinocyclocheilus rhinocerous	508	Eukaryota	Vertebrates	Fishes	Fishes	Indian rhinoceros
334	ACACTG	6516	58	25	17	Drosophila suzukii	418	Eukaryota	Invertebrates	Insects	Insects	Spotted wing fruit fly
335	ACAGAG	1620	429.5	94	50	Sinocyclocheilus anshuiensis	506	Eukaryota	Vertebrates	Fishes	Fishes	Eyeless goldenline fish
336	ACAGAT	2938	633	141	29	Tupaia chinensis	702	Eukaryota	Vertebrates	Mammals	Rodentia	Chinese tree shrew
337	ACAGCC	918	78	38	24	Ficedula albicollis	562	Eukaryota	Vertebrates	Birds	Birds	Collared flycatcher
338	ACAGCG	567	50.5	25	17	Volvox carteri f. nagariensis	76	Eukaryota	Plants	Green Algae	Green Algae	NA
339	ACAGCT	142	47	27	17	Drosophila mojavensis	435	Eukaryota	Invertebrates	Insects	Insects	NA
340	ACAGGC	890	105.5	41	20	Cricetulus griseus	692	Eukaryota	Vertebrates	Mammals	Rodentia	Chinese hamster
341	ACAGGG	4873	511	58.5	25	Ficedula albicollis	562	Eukaryota	Vertebrates	Birds	Birds	Collared flycatcher
342	ACAGGT	884	59	27	17	Gossypium hirsutum	109	Eukaryota	Plants	Land Plants	Land Plants	Upland cotton;Mexican cotton
343	ACAGTC	213	51	27	17	Corvus brachyrhynchos	560	Eukaryota	Vertebrates	Birds	Birds	American crow
344	ACAGTG	433	50	29	22	Ficedula albicollis	562	Eukaryota	Vertebrates	Birds	Birds	Collared flycatcher
345	ACATAG	844	111	60	20	Ficedula albicollis	562	Eukaryota	Vertebrates	Birds	Birds	Collared flycatcher
346	ACATAT	21671	969	226	71	Lupinus angustifolius	122	Eukaryota	Plants	Land Plants	Land Plants	Narrowleaf lupin;Blue lupin
347	ACATCC	445	73	33	21	Megachile rotundata	495	Eukaryota	Invertebrates	Insects	Insects	Alfa alfa leafcutting bee
348	ACATCG	96	35	23	15	Stomoxys calcitrans	441	Eukaryota	Invertebrates	Insects	Insects	Stable fly
349	ACATCT	2667	118.5	47	19	Ficedula albicollis	562	Eukaryota	Vertebrates	Birds	Birds	Collared flycatcher
350	ACATGC	461	65	33	22	Clupea harengus	504	Eukaryota	Vertebrates	Fishes	Fishes	Atlantic herring
351	ACATGG	587	59	29	18	Larimichthys crocea	533	Eukaryota	Vertebrates	Fishes	Fishes	Large yellow croaker
352	ACATGT	166	38.5	25	18	Chaetura pelagica	609	Eukaryota	Vertebrates	Birds	Birds	Chimney swift
353	ACCACG	332	58	30	18	Ceratosolen solmsi marchali	484	Eukaryota	Invertebrates	Insects	Insects	Fig wasp
354	ACCACT	569	91.5	38	21	Ceratosolen solmsi marchali	484	Eukaryota	Invertebrates	Insects	Insects	Fig wasp
355	ACCAGC	770	106.5	44	24	Gavialis gangeticus	550	Eukaryota	Vertebrates	Reptiles	Reptiles	Indian gharial
356	ACCAGG	869	98.5	41	21	Anser cygnoides domesticus	611	Eukaryota	Vertebrates	Birds	Birds	Swan Goose;Goose;Domestic Goose
357	ACCAGT	162	46.5	26	17	Volvox carteri f. nagariensis	76	Eukaryota	Plants	Green Algae	Green Algae	NA
358	ACCATC	1907	146	55	29	Solanum pennellii	141	Eukaryota	Plants	Land Plants	Land Plants	Wild tomato
359	ACCATG	331	47	26	17	Gavialis gangeticus	550	Eukaryota	Vertebrates	Reptiles	Reptiles	Indian gharial
360	ACCCAG	441	59	30	19	Antrostomus carolinensis	607	Eukaryota	Vertebrates	Birds	Birds	Chuck-will's-widow
361	ACCCAT	931	58	28	17	Cephus cinctus	491	Eukaryota	Invertebrates	Insects	Insects	Wheat stem sawfly
362	ACCCCC	550	49	35	27	Miniopterus natalensis	656	Eukaryota	Vertebrates	Mammals	Chiroptera	Natal long-fingered bat
363	ACCCCG	261	45	29	20	Chlamydomonas reinhardtii	75	Eukaryota	Plants	Green Algae	Green Algae	NA
364	ACCCCT	2735	53	29	18	Corvus brachyrhynchos	560	Eukaryota	Vertebrates	Birds	Birds	American crow
365	ACCCGC	434	62	30	18	Endocarpon pusillum Z07020	198	Eukaryota	Fungi	Ascomycetes	Ascomycetes	NA
366	ACCCGG	4591	45	26	17	Cricetulus griseus	692	Eukaryota	Vertebrates	Mammals	Rodentia	Chinese hamster
367	ACCCGT	167	46	25	16	Clupea harengus	504	Eukaryota	Vertebrates	Fishes	Fishes	Atlantic herring
368	ACCCTC	3158	106.5	41	22	Ficedula albicollis	562	Eukaryota	Vertebrates	Birds	Birds	Collared flycatcher
369	ACCCTG	2792	83	41	23	Ursus maritimus	623	Eukaryota	Vertebrates	Mammals	Carnivora	Polar bear
370	ACCGAG	226	52	32	19	Bombyx mori	442	Eukaryota	Invertebrates	Insects	Insects	Silk moth
371	ACCGAT	466	34.5	22	17	Bombus impatiens	459	Eukaryota	Invertebrates	Insects	Insects	Bumblebee
372	ACCGCC	602	84.5	37	23	Ceratosolen solmsi marchali	484	Eukaryota	Invertebrates	Insects	Insects	Fig wasp
373	ACCGCG	186	34	23	15	Cerapachys biroi	479	Eukaryota	Invertebrates	Insects	Insects	Clonal raider ant
374	ACCGCT	185	32	19	14	Volvox carteri f. nagariensis	76	Eukaryota	Plants	Green Algae	Green Algae	NA
375	ACCGGC	527	56	29	18	Ficedula albicollis	562	Eukaryota	Vertebrates	Birds	Birds	Collared flycatcher
376	ACCGGG	4583	48	29	17	Chaetura pelagica	609	Eukaryota	Vertebrates	Birds	Birds	Chimney swift
377	ACCGGT	123	25	18	14	Pogonomyrmex barbatus	473	Eukaryota	Invertebrates	Insects	Insects	Red harvester ant
378	ACCGTC	513	51	26	17	Ceratosolen solmsi marchali	484	Eukaryota	Invertebrates	Insects	Insects	Fig wasp
379	ACCGTG	86	35	23	15	Exophiala spinifera	190	Eukaryota	Fungi	Ascomycetes	Ascomycetes	NA
380	ACCTAG	150	47	22	15	Loxodonta africana	714	Eukaryota	Vertebrates	Mammals	Other	African Bush Elephant
381	ACCTAT	2047	133.5	56.5	18	Ficedula albicollis	562	Eukaryota	Vertebrates	Birds	Birds	Collared flycatcher
382	ACCTCC	995	86	41	23	Ficedula albicollis	562	Eukaryota	Vertebrates	Birds	Birds	Collared flycatcher
383	ACCTCG	161	37	24	17	Monosiga brevicollis MX1	37	Eukaryota	Protists	Other Protists	Other Protists	NA
384	ACCTCT	463	95.5	45	20	Camelina sativa	100	Eukaryota	Plants	Land Plants	Land Plants	Wild flax;Gold of pleasure;German sesame;Siberian oilseed
385	ACCTGC	341	58	29	19	Volvox carteri f. nagariensis	76	Eukaryota	Plants	Green Algae	Green Algae	NA
386	ACCTGG	865	63.5	31	18	Miniopterus natalensis	656	Eukaryota	Vertebrates	Mammals	Chiroptera	Natal long-fingered bat
387	ACGACT	578	46	24	16	Drosophila mojavensis	435	Eukaryota	Invertebrates	Insects	Insects	NA
388	ACGAGC	100	39	23	15	Acanthamoeba castellanii str. Neff	56	Eukaryota	Protists	Other Protists	Other Protists	NA
389	ACGAGG	4649	61.5	35	23	Lupinus angustifolius	122	Eukaryota	Plants	Land Plants	Land Plants	Narrowleaf lupin;Blue lupin
390	ACGAGT	47	32	24	16	Drosophila rhopaloa	422	Eukaryota	Invertebrates	Insects	Insects	NA
391	ACGATC	925	38.5	23	15	Megachile rotundata	495	Eukaryota	Invertebrates	Insects	Insects	Alfa alfa leafcutting bee
392	ACGATG	1522	87	41	23	Larimichthys crocea	533	Eukaryota	Vertebrates	Fishes	Fishes	Large yellow croaker
393	ACGCAG	373	48	26	16	Mus musculus	696	Eukaryota	Vertebrates	Mammals	Rodentia	House mouse
394	ACGCAT	432	47	22	15	Trichechus manatus latirostris	715	Eukaryota	Vertebrates	Mammals	Other	West Indian manatee;Florida manatee
395	ACGCCC	429	63	28	18	Brassica oleracea var. oleracea	104	Eukaryota	Plants	Land Plants	Land Plants	Wild cabbage
396	ACGCCG	131	43	29	20	Eucalyptus grandis	114	Eukaryota	Plants	Land Plants	Land Plants	Flooded gum;Rose gum
397	ACGCCT	82	27	17	13	Priapulus caudatus	389	Eukaryota	Invertebrates	Roundworms	Roundworms	Priapulid worm
398	ACGCGC	270	51	30	19	Ceratosolen solmsi marchali	484	Eukaryota	Invertebrates	Insects	Insects	Fig wasp
399	ACGCGG	106	31	22	15	Aureococcus anophagefferens	74	Eukaryota	Protists	Other Protists	Other Protists	NA
400	ACGCGT	30	20	16	13	Trachymyrmex zeteki	469	Eukaryota	Invertebrates	Insects	Insects	NA
401	ACGCTC	365	36	22	15	Chlamydomonas reinhardtii	75	Eukaryota	Plants	Green Algae	Green Algae	NA
402	ACGCTG	141	29	21	15	Pteropus vampyrus	660	Eukaryota	Vertebrates	Mammals	Chiroptera	Large flying fox
403	ACGGAG	290	59	29	17	Aedes aegypti	405	Eukaryota	Invertebrates	Insects	Insects	Yellowfever mosquito
404	ACGGAT	190	33	23	15	Drosophila arizonae	434	Eukaryota	Invertebrates	Insects	Insects	NA
405	ACGGCC	119	40	27	18	Pelodiscus sinensis	553	Eukaryota	Vertebrates	Reptiles	Reptiles	Chinese softshell turtle
406	ACGGCG	329	52	34	22	Harpegnathos saltator	477	Eukaryota	Invertebrates	Insects	Insects	Jerdonâ€™s jumping ant
407	ACGGCT	269	44	23	15	Nicotiana tabacum	144	Eukaryota	Plants	Land Plants	Land Plants	Cultivated tobacco
408	ACGGGC	118	40	25	16	Heterobasidion irregulare TC 32-1	348	Eukaryota	Fungi	Basidiomycetes	Basidiomycetes	NA
409	ACGGGG	617	59	32	19	Cajanus cajan	115	Eukaryota	Plants	Land Plants	Land Plants	Pegion pea
410	ACGTAG	801	38	19	14	Ficedula albicollis	562	Eukaryota	Vertebrates	Birds	Birds	Collared flycatcher
411	ACGTAT	293	41	23	16	Ficedula albicollis	562	Eukaryota	Vertebrates	Birds	Birds	Collared flycatcher
412	ACGTCC	119	36	23	16	Papilio machaon	443	Eukaryota	Invertebrates	Insects	Insects	Old world swallowtail butterfly
413	ACGTCG	42	28	21	15	Micromonas pusilla CCMP1545	81	Eukaryota	Plants	Green Algae	Green Algae	NA
414	ACGTGC	33	24	19	15	Peromyscus maniculatus bairdii	695	Eukaryota	Vertebrates	Mammals	Rodentia	Deer mouse
415	ACTAGC	413	35	21	16	Ficedula albicollis	562	Eukaryota	Vertebrates	Birds	Birds	Collared flycatcher
416	ACTAGG	458	53.5	22	15	Aedes albopictus	406	Eukaryota	Invertebrates	Insects	Insects	Asian tiger musquito
417	ACTAGT	167	32	23	17	Nipponia nippon	593	Eukaryota	Vertebrates	Birds	Birds	Crested ibis
418	ACTATC	356	64	28	18	Ficedula albicollis	562	Eukaryota	Vertebrates	Birds	Birds	Collared flycatcher
419	ACTATG	339	63	27	16	Sinocyclocheilus grahami	507	Eukaryota	Vertebrates	Fishes	Fishes	Dianchi golden-line fish
420	ACTCAG	245	52.5	26	17	Sinocyclocheilus grahami	507	Eukaryota	Vertebrates	Fishes	Fishes	Dianchi golden-line fish
421	ACTCAT	3017	64	25	17	Sinocyclocheilus rhinocerous	508	Eukaryota	Vertebrates	Fishes	Fishes	Indian rhinoceros
422	ACTCCC	916	61	30	20	Ficedula albicollis	562	Eukaryota	Vertebrates	Birds	Birds	Collared flycatcher
423	ACTCCG	76	38	27	20	Culex quinquefasciatus	408	Eukaryota	Invertebrates	Insects	Insects	Southern house musquito
424	ACTCCT	601	67.5	29	17	Lupinus angustifolius	122	Eukaryota	Plants	Land Plants	Land Plants	Narrowleaf lupin;Blue lupin
425	ACTCGC	317	41	26	17	Sinocyclocheilus rhinocerous	508	Eukaryota	Vertebrates	Fishes	Fishes	Indian rhinoceros
426	ACTCGG	755	78	46	19	Amyelois transitella	446	Eukaryota	Invertebrates	Insects	Insects	Navel orangeworm moth
427	ACTCTC	4433	187	45	23	Sinocyclocheilus anshuiensis	506	Eukaryota	Vertebrates	Fishes	Fishes	Eyeless goldenline fish
428	ACTCTG	1100	101.5	29	18	Aedes albopictus	406	Eukaryota	Invertebrates	Insects	Insects	Asian tiger musquito
429	ACTGAG	335	86	29	18	Drosophila navojoa	436	Eukaryota	Invertebrates	Insects	Insects	NA
430	ACTGAT	312	59	27	17	Aedes albopictus	406	Eukaryota	Invertebrates	Insects	Insects	Asian tiger musquito
431	ACTGCC	1352	59	33	22	Bombus impatiens	459	Eukaryota	Invertebrates	Insects	Insects	Bumblebee
432	ACTGCG	368	41	27	17	Camponotus floridanus	478	Eukaryota	Invertebrates	Insects	Insects	Carpenter ant
433	ACTGCT	2771	128	53	24	Nicotiana sylvestris	143	Eukaryota	Plants	Land Plants	Land Plants	Woodland tobacco;Flowering tobacco
434	ACTGGC	891	47	29	18	Ficedula albicollis	562	Eukaryota	Vertebrates	Birds	Birds	Collared flycatcher
435	ACTGGG	1969	77	33	19	Drosophila melanogaster	425	Eukaryota	Invertebrates	Insects	Insects	Fruitfly
436	AGAGAT	3792	492.5	105	52	Rhagoletis zephyria	413	Eukaryota	Invertebrates	Insects	Insects	Snow berry friutfly
437	AGAGCC	966	145	43	23	Aedes albopictus	406	Eukaryota	Invertebrates	Insects	Insects	Asian tiger musquito
438	AGAGCG	3339	137.5	51	27	Diachasma alloeum	489	Eukaryota	Invertebrates	Insects	Insects	NA
439	AGAGCT	539	59	26	16	Volvox carteri f. nagariensis	76	Eukaryota	Plants	Green Algae	Green Algae	NA
440	AGAGGC	4670	584	175	39	Cricetulus griseus	692	Eukaryota	Vertebrates	Mammals	Rodentia	Chinese hamster
441	AGAGGG	4472	342.5	134	56	Myotis davidii	655	Eukaryota	Vertebrates	Mammals	Chiroptera	Davidâ€™s myotis
442	AGATAT	8913	1227.5	314.5	75	Drosophila busckii	439	Eukaryota	Invertebrates	Insects	Insects	NA
443	AGATCC	553	41	26	17	Cricetulus griseus	692	Eukaryota	Vertebrates	Mammals	Rodentia	Chinese hamster
444	AGATCG	68	32	22	16	Aedes aegypti	405	Eukaryota	Invertebrates	Insects	Insects	Yellowfever mosquito
445	AGATCT	191	49	33	22	Aplysia californica	498	Eukaryota	Invertebrates	Molluscs	Molluscs	California sea hare
446	AGATGC	290	47	28	18	Drosophila arizonae	434	Eukaryota	Invertebrates	Insects	Insects	NA
447	AGATGG	3296	236.5	54.5	23	Ficedula albicollis	562	Eukaryota	Vertebrates	Birds	Birds	Collared flycatcher
448	AGCAGG	1908	171	60	27	Ficedula albicollis	562	Eukaryota	Vertebrates	Birds	Birds	Collared flycatcher
449	AGCATC	792	70	35	22	Aedes albopictus	406	Eukaryota	Invertebrates	Insects	Insects	Asian tiger musquito
450	AGCATG	539	61	33	23	Lupinus angustifolius	122	Eukaryota	Plants	Land Plants	Land Plants	Narrowleaf lupin;Blue lupin
451	AGCCAT	216	46	25	16	Ficedula albicollis	562	Eukaryota	Vertebrates	Birds	Birds	Collared flycatcher
452	AGCCCC	466	99	51	28	Colobus angolensis palliatus	676	Eukaryota	Vertebrates	Mammals	Primates	Angolan back-white colobus
453	AGCCCG	664	51.5	31	19	Ficedula albicollis	562	Eukaryota	Vertebrates	Birds	Birds	Collared flycatcher
454	AGCCCT	2051	101	35	21	Gekko japonicus	558	Eukaryota	Vertebrates	Reptiles	Reptiles	Gekko;Schlegelâ€™s Japanese Gecko
455	AGCCGC	497	57	31	21	Brassica oleracea var. oleracea	104	Eukaryota	Plants	Land Plants	Land Plants	Wild cabbage
456	AGCCGG	389	59	33	21	Mus musculus	696	Eukaryota	Vertebrates	Mammals	Rodentia	House mouse
457	AGCCTC	525	74.5	34	21	Cynoglossus semilaevis	545	Eukaryota	Vertebrates	Fishes	Fishes	Tongue sole
458	AGCCTG	5663	94	35	19	Cricetulus griseus	692	Eukaryota	Vertebrates	Mammals	Rodentia	Chinese hamster
459	AGCGAT	64	26	18	14	Priapulus caudatus	389	Eukaryota	Invertebrates	Roundworms	Roundworms	Priapulid worm
460	AGCGCC	118	35	23	17	Chlamydomonas reinhardtii	75	Eukaryota	Plants	Green Algae	Green Algae	NA
461	AGCGCG	47	29	23	17	Octodon degus	705	Eukaryota	Vertebrates	Mammals	Rodentia	Degu
462	AGCGCT	47	19	15	12	Asparagus officinalis	97	Eukaryota	Plants	Land Plants	Land Plants	Garden asparagus
463	AGCGGC	213	58	32	23	Myotis davidii	655	Eukaryota	Vertebrates	Mammals	Chiroptera	Davidâ€™s myotis
464	AGCGGG	1088	62	29	19	Miniopterus natalensis	656	Eukaryota	Vertebrates	Mammals	Chiroptera	Natal long-fingered bat
465	AGCTAT	143	35	22	16	Myotis brandtii	653	Eukaryota	Vertebrates	Mammals	Chiroptera	Brandt's bat
466	AGCTCC	1034	84.5	40	23	Ficedula albicollis	562	Eukaryota	Vertebrates	Birds	Birds	Collared flycatcher
467	AGCTCG	36	30	23	17	Erythranthe guttata	148	Eukaryota	Plants	Land Plants	Land Plants	Seep mokeyflower;Yellow monkey flower
468	AGCTGC	91	28.5	23	18	Monopterus albus	537	Eukaryota	Vertebrates	Fishes	Fishes	Asian swamp eel
469	AGGATC	4583	66	31	18	Lupinus angustifolius	122	Eukaryota	Plants	Land Plants	Land Plants	Narrowleaf lupin;Blue lupin
470	AGGATG	4282	634	85	42	Lupinus angustifolius	122	Eukaryota	Plants	Land Plants	Land Plants	Narrowleaf lupin;Blue lupin
471	AGGCAT	611	65.5	23	16	Cricetulus griseus	692	Eukaryota	Vertebrates	Mammals	Rodentia	Chinese hamster
472	AGGCCC	425	53	33	22	Gavialis gangeticus	550	Eukaryota	Vertebrates	Reptiles	Reptiles	Indian gharial
473	AGGCCG	55	32	24	18	Ananas comosus	93	Eukaryota	Plants	Land Plants	Land Plants	NA
474	AGGCCT	38	22	17	14	Amborella trichopoda	152	Eukaryota	Plants	Land Plants	Land Plants	NA
475	AGGCGC	151	49.5	26	17	Chlamydomonas reinhardtii	75	Eukaryota	Plants	Green Algae	Green Algae	NA
476	AGGCGG	443	98.5	40	23	Miniopterus natalensis	656	Eukaryota	Vertebrates	Mammals	Chiroptera	Natal long-fingered bat
477	AGGGAT	3993	121.5	49	17	Anser cygnoides domesticus	611	Eukaryota	Vertebrates	Birds	Birds	Swan Goose;Goose;Domestic Goose
478	AGGGCC	499	58	36	23	Alligator sinensis	548	Eukaryota	Vertebrates	Reptiles	Reptiles	Chinese alligator
479	AGGGCG	239	64	34	20	Volvox carteri f. nagariensis	76	Eukaryota	Plants	Green Algae	Green Algae	NA
480	AGGGGC	827	143	60	27	Pseudopodoces humilis	565	Eukaryota	Vertebrates	Birds	Birds	Tibetian ground jay
481	AGGGGG	1926	67	39	26	Cynoglossus semilaevis	545	Eukaryota	Vertebrates	Fishes	Fishes	Tongue sole
482	ATATCC	1373	95	45	20	Ficedula albicollis	562	Eukaryota	Vertebrates	Birds	Birds	Collared flycatcher
483	ATATCG	52	26.5	19	15	Thamnophis sirtalis	556	Eukaryota	Vertebrates	Reptiles	Reptiles	Common garter snake;Eastern garter snake
484	ATATGC	308	36	23	17	Ficedula albicollis	562	Eukaryota	Vertebrates	Birds	Birds	Collared flycatcher
485	ATCATG	248	35	23	17	Python bivittatus	557	Eukaryota	Vertebrates	Reptiles	Reptiles	Burmese python
486	ATCCCC	1100	105	46	24	Falco cherrug	601	Eukaryota	Vertebrates	Birds	Birds	Saker falcon
487	ATCCCG	1644	53.5	28	17	Corvus brachyrhynchos	560	Eukaryota	Vertebrates	Birds	Birds	American crow
488	ATCCGC	150	39	25	17	Drosophila arizonae	434	Eukaryota	Invertebrates	Insects	Insects	NA
489	ATCCGG	344	26	20	15	Brassica oleracea var. oleracea	104	Eukaryota	Plants	Land Plants	Land Plants	Wild cabbage
490	ATCGCC	556	52	29	19	Ceratosolen solmsi marchali	484	Eukaryota	Invertebrates	Insects	Insects	Fig wasp
491	ATCGCG	39	24	18	14	Phoenix dactylifera	96	Eukaryota	Plants	Land Plants	Land Plants	Date palm;Date
492	ATCGGC	155	40	26	17	Phytophthora sojae	69	Eukaryota	Protists	Other Protists	Other Protists	NA
493	ATGCCC	511	50	29	18	Ficedula albicollis	562	Eukaryota	Vertebrates	Birds	Birds	Collared flycatcher
494	ATGCGC	38	24	18	15	Fonticula alba	65	Eukaryota	Protists	Other Protists	Other Protists	NA
495	ATGGCC	40	25	20	16	Drosophila navojoa	436	Eukaryota	Invertebrates	Insects	Insects	NA
496	CCCCCG	740	50.5	33	23	Amyelois transitella	446	Eukaryota	Invertebrates	Insects	Insects	Navel orangeworm moth
497	CCCCGG	482	63	36	23	Cynoglossus semilaevis	545	Eukaryota	Vertebrates	Fishes	Fishes	Tongue sole
498	CCCGCG	321	40	28	19	Lipotes vexillifer	634	Eukaryota	Vertebrates	Mammals	Cetacea	Yangtze river dolphin
499	CCCGGG	34	25	20	15	Octodon degus	705	Eukaryota	Vertebrates	Mammals	Rodentia	Degu
500	CCGCGG	35	26	21	16	Harpegnathos saltator	477	Eukaryota	Invertebrates	Insects	Insects	Jerdonâ€™s jumping ant
501	CCGGCG	123	28	23	17	Oryza brachyantha	88	Eukaryota	Plants	Land Plants	Land Plants	NA

## Sheet: speciesWise_medianLengths
ES.no	Organism	Kingdom	Group	Subgroup	Common_name	Longest repeat class	Longest repeat length (bp)	Median of 100 longest repeats	Median of 1000 longest repeats	Median of 10000 longest repeats
1	Plasmodium coatneyi	Eukaryota	Protists	Apicomplexans	NA	AAAGG	352	52	31.5	22
2	Plasmodium falciparum 3D7	Eukaryota	Protists	Apicomplexans	NA	AAAC	511	74.5	51	37
3	Plasmodium gaboni	Eukaryota	Protists	Apicomplexans	NA	A	329	122.5	62	35
4	Plasmodium reichenowi	Eukaryota	Protists	Apicomplexans	NA	A	168	99.5	58	39
5	Plasmodium cynomolgi strain B	Eukaryota	Protists	Apicomplexans	NA	AATAT	150	37	27	19
6	Plasmodium fragile	Eukaryota	Protists	Apicomplexans	NA	A	108	65.5	39	24
7	Plasmodium inui San Antonio 1	Eukaryota	Protists	Apicomplexans	NA	A	106	42.5	25	16
8	Plasmodium knowlesi strain H	Eukaryota	Protists	Apicomplexans	NA	ACAT	312	81.5	41	28
9	Plasmodium vivax	Eukaryota	Protists	Apicomplexans	NA	ACAT	353	57.5	30	21
10	Plasmodium berghei	Eukaryota	Protists	Apicomplexans	NA	AATAT	263	62	31	16
11	Plasmodium chabaudi chabaudi	Eukaryota	Protists	Apicomplexans	NA	ACAT	139	32.5	23	15
12	Plasmodium vinckei vinckei	Eukaryota	Protists	Apicomplexans	NA	ACAT	99	39	24	15
13	Plasmodium yoelii yoelii	Eukaryota	Protists	Apicomplexans	NA	ACAT	383	52	32	20
14	Babesia bigemina	Eukaryota	Protists	Apicomplexans	NA	ATC	63	22	15	12
15	Babesia bovis	Eukaryota	Protists	Apicomplexans	NA	AT	40	19	13	12
16	Babesia microti strain RI	Eukaryota	Protists	Apicomplexans	NA	AGGGAT	40	21	14	12
17	Theileria annulata strain Ankara	Eukaryota	Protists	Apicomplexans	NA	AACCTG	53	22	16	12
18	Theileria equi strain WA	Eukaryota	Protists	Apicomplexans	NA	AAAG	47	17	14	12
19	Theileria orientalis strain Shintoku	Eukaryota	Protists	Apicomplexans	NA	AACAAT	341	21	16	12
20	Theileria parva	Eukaryota	Protists	Apicomplexans	NA	AATTCC	41	22	16	12
21	Cryptosporidium hominis	Eukaryota	Protists	Apicomplexans	NA	AAGAGG	218	71	39	14
22	Cryptosporidium muris RN66	Eukaryota	Protists	Apicomplexans	NA	AAT	214	35	18	12
23	Cryptosporidium parvum Iowa II	Eukaryota	Protists	Apicomplexans	NA	AACAGG	190	46	25	13
24	Eimeria acervulina	Eukaryota	Protists	Apicomplexans	NA	AAT	111	70	61	37
25	Eimeria maxima	Eukaryota	Protists	Apicomplexans	NA	AACCCT	128	84	70	47
26	Eimeria mitis	Eukaryota	Protists	Apicomplexans	NA	AGAT	153	75	70	60
27	Eimeria necatrix	Eukaryota	Protists	Apicomplexans	NA	AGC	147	87	75	53
28	Eimeria tenella	Eukaryota	Protists	Apicomplexans	NA	AGATAT	545	98.5	53	35
29	Hammondia hammondi	Eukaryota	Protists	Apicomplexans	NA	AG	349	150.5	35	20
30	Neospora caninum Liverpool	Eukaryota	Protists	Apicomplexans	NA	ACAT	343	86.5	43	25
31	Toxoplasma gondii ME49	Eukaryota	Protists	Apicomplexans	NA	AAG	236	54	38	24
32	Gregarina niphandrodes	Eukaryota	Protists	Apicomplexans	NA	C	48	26	17	12
33	Nannochloropsis gaditana CCMP526	Eukaryota	Protists	Other Protists	NA	AACCCT	252	58.5	31	16
34	Naegleria gruberi	Eukaryota	Protists	Other Protists	NA	AAACCC	475	289.5	24	15
35	Sphaeroforma arctica JP610	Eukaryota	Protists	Other Protists	NA	AAAC	479	178	118	49
36	Capsaspora owczarzaki ATCC 30864	Eukaryota	Protists	Other Protists	NA	AAC	338	173	57	25
37	Monosiga brevicollis MX1	Eukaryota	Protists	Other Protists	NA	ACAGAG	450	231.5	112	32
38	Salpingoeca rosetta	Eukaryota	Protists	Other Protists	NA	ACACTC	318	208	135	87
39	Acytostelium subglobosum LB1	Eukaryota	Protists	Other Protists	NA	AATC	112	65	33	22
40	Dictyostelium discoideum	Eukaryota	Protists	Other Protists	NA	AT	409	176	129	63
41	Dictyostelium fasciculatum	Eukaryota	Protists	Other Protists	NA	AT	394	109	61	25
42	Dictyostelium purpureum	Eukaryota	Protists	Other Protists	NA	AAAATG	165	102	66	27
43	Polysphondylium pallidum PN500	Eukaryota	Protists	Other Protists	NA	AAGGGT	187	78.5	38.5	22
44	Emiliania huxleyi CCMP1516	Eukaryota	Protists	Other Protists	NA	AACCCT	1258	618	160	63
45	Leishmania donovani	Eukaryota	Protists	Kinetoplasts	NA	ACACGC	107	45	30	18
46	Leishmania infantum JPCM5	Eukaryota	Protists	Kinetoplasts	NA	AACCCT	289	124	40	19
47	Leishmania major strain Friedlin	Eukaryota	Protists	Kinetoplasts	NA	AACCCT	778	118	43	23
48	Leishmania mexicana MHOM/GT/2001/U1103	Eukaryota	Protists	Kinetoplasts	NA	AACCCT	808	147.5	31	19
49	Leishmania braziliensis MHOM/BR/75/M2904	Eukaryota	Protists	Kinetoplasts	NA	AACCCT	830	139	36	19
50	Leishmania panamensis	Eukaryota	Protists	Kinetoplasts	NA	AC	374	52.5	29	18
51	Leptomonas pyrrhocoris	Eukaryota	Protists	Kinetoplasts	NA	C	379	42	30	18
52	Trypanosoma grayi	Eukaryota	Protists	Kinetoplasts	NA	AACCCT	161	41	30	20
53	Trypanosoma cruzi	Eukaryota	Protists	Kinetoplasts	NA	AACCCT	843	187	49	26
54	Trypanosoma brucei brucei TREU927	Eukaryota	Protists	Kinetoplasts	NA	AACCCT	486	92	30	18
55	Trypanosoma brucei gambiense DAL972	Eukaryota	Protists	Kinetoplasts	NA	AAT	205	65	31	18
56	Acanthamoeba castellanii str. Neff	Eukaryota	Protists	Other Protists	NA	AACCCT	475	143.5	74	26
57	Thecamonas trahens ATCC 50062	Eukaryota	Protists	Other Protists	NA	AACCCT	453	95	47	21
58	Entamoeba dispar SAW760	Eukaryota	Protists	Other Protists	NA	AAT	104	51.5	29	17
59	Entamoeba histolytica HM-1:IMSS	Eukaryota	Protists	Other Protists	NA	ACTC	763	25	18	14
60	Entamoeba invadens IP1	Eukaryota	Protists	Other Protists	NA	AACTAT	571	122	20	14
61	Entamoeba nuttalli P19	Eukaryota	Protists	Other Protists	NA	A	31	20	16	13
62	Giardia lamblia ATCC 50803	Eukaryota	Protists	Other Protists	NA	AAC	30	18	14	12
63	Blastocystis hominis	Eukaryota	Protists	Other Protists	NA	AACCCT	922	80	32	17
64	Blastocystis sp. subtype 4	Eukaryota	Protists	Other Protists	NA	AACATG	45	19.5	15	12
65	Fonticula alba	Eukaryota	Protists	Other Protists	NA	C	208	95	62	30
66	Trichomonas vaginalis G3	Eukaryota	Protists	Other Protists	NA	AATAG	1733	62	32	17
67	Phytophthora infestans T30-4	Eukaryota	Protists	Other Protists	NA	AT	995	78	25	16
68	Phytophthora parasitica INRA-310	Eukaryota	Protists	Other Protists	NA	AG	96	53.5	21	14
69	Phytophthora sojae	Eukaryota	Protists	Other Protists	NA	AGAT	607	82	27	16
70	Aphanomyces astaci	Eukaryota	Protists	Other Protists	NA	AT	93	45	30	18
71	Aphanomyces invadans	Eukaryota	Protists	Other Protists	NA	AT	32	21	16	13
72	Saprolegnia diclina VS20	Eukaryota	Protists	Other Protists	NA	AGAT	99	76	19	14
73	Saprolegnia parasitica CBS 223.65	Eukaryota	Protists	Other Protists	NA	AGAT	228	97.5	22	15
74	Aureococcus anophagefferens	Eukaryota	Protists	Other Protists	NA	AACCCT	445	58	31	19
75	Chlamydomonas reinhardtii	Eukaryota	Plants	Green Algae	NA	ACGCTC	365	207	119	54
76	Volvox carteri f. nagariensis	Eukaryota	Plants	Green Algae	NA	ACTGCC	702	355	168	44
77	Monoraphidium neglectum	Eukaryota	Plants	Green Algae	NA	ATC	186	119	80	43
78	Ostreococcus lucimarinus CCE9901	Eukaryota	Plants	Green Algae	NA	AAGAGG	151	44	29	16
79	Ostreococcus tauri	Eukaryota	Plants	Green Algae	NA	ACG	116	38	22	14
80	Micromonas commoda	Eukaryota	Plants	Green Algae	NA	ACT	191	46	28	16
81	Micromonas pusilla CCMP1545	Eukaryota	Plants	Green Algae	NA	ACG	197	65	40	25
82	Auxenochlorella protothecoides	Eukaryota	Plants	Green Algae	NA	AC	1056	38	21	14
83	Chlorella variabilis	Eukaryota	Plants	Green Algae	NA	AT	1305	78	41	23
84	Coccomyxa subellipsoidea C-169	Eukaryota	Plants	Green Algae	NA	ACTATC	347	101	24	15
85	Cyanidioschyzon merolae strain 10D	Eukaryota	Plants	Green Algae	NA	ACAG	136	43	26	13
86	Aegilops tauschii subsp. tauschii	Eukaryota	Plants	Land Plants	Tausch's goatgrass;Rough-spike hard grass	ACTGCT	374	149	99	66
87	Brachypodium distachyon	Eukaryota	Plants	Land Plants	Purple false brome;Stiff brome	ACAT	470	85	42	22
88	Oryza brachyantha	Eukaryota	Plants	Land Plants	NA	AGC	1185	635	159.5	25
89	Oryza sativa Japonica Group	Eukaryota	Plants	Land Plants	Rice;Asian rice	AT	713	138.5	87	40
90	Sorghum bicolor	Eukaryota	Plants	Land Plants	Broom corn;Great millet;Jowari;Milo	AATAT	741	292	145.5	48
91	Zea mays	Eukaryota	Plants	Land Plants	Maize	AC	1684	173.5	118	62
92	Setaria italica	Eukaryota	Plants	Land Plants	Foxtail millet	ACAT	187	101	58	24
93	Ananas comosus	Eukaryota	Plants	Land Plants	NA	AC	2879	438	78	50
94	Musa acuminata subsp. malaccensis	Eukaryota	Plants	Land Plants	Banana;Kela	AAT	288	140	92	54
95	Elaeis guineensis	Eukaryota	Plants	Land Plants	Africa oil palm;Macaw fat	ACGT	615	119	86	48
96	Phoenix dactylifera	Eukaryota	Plants	Land Plants	Date palm;Date	AAAG	384	85	58	39
97	Asparagus officinalis	Eukaryota	Plants	Land Plants	Garden asparagus	AAT	16192	780.5	124	54
98	Arabidopsis lyrata subsp. lyrata	Eukaryota	Plants	Land Plants	NA	AAT	304	90	52	27
99	Arabidopsis thaliana	Eukaryota	Plants	Land Plants	NA	AAG	603	91	40	21
100	Camelina sativa	Eukaryota	Plants	Land Plants	Wild flax;Gold of pleasure;German sesame;Siberian oilseed	AACCG	4837	492.5	94	41
101	Capsella rubella	Eukaryota	Plants	Land Plants	Pink sheperd's purse	AAT	257	117	48	24
102	Brassica napus	Eukaryota	Plants	Land Plants	Rapeseed;Oilseed rape;Rapa;Rappi	AT	11113	296.5	143	35
103	Brassica rapa	Eukaryota	Plants	Land Plants	Turnip	AG	7289	793.5	148	25
104	Brassica oleracea var. oleracea	Eukaryota	Plants	Land Plants	Wild cabbage	AT	4904	356.5	54	33
105	Raphanus sativus	Eukaryota	Plants	Land Plants	Radish;Moolee	AG	747	156	80	31
106	Eutrema salsugineum	Eukaryota	Plants	Land Plants	Saltwater cress	AAG	327	116.5	50	25
107	Tarenaya hassleriana	Eukaryota	Plants	Land Plants	Spider flower;Spider plant;Pink queen	ACAT	2067	330.5	104	39
108	Gossypium arboreum	Eukaryota	Plants	Land Plants	Tree cotton;Cotton	AAT	16241	499	105	39
109	Gossypium hirsutum	Eukaryota	Plants	Land Plants	Upland cotton;Mexican cotton	A	1076	841	137	36
110	Gossypium raimondii	Eukaryota	Plants	Land Plants	Peru cotton	AAT	560	122	68	38
111	Theobroma cacao	Eukaryota	Plants	Land Plants	Cacao tree;Cocoa tree	AG	214	65	48	29
112	Citrus clementina	Eukaryota	Plants	Land Plants	Clementine	AAT	525	93.5	59	30
113	Citrus sinensis	Eukaryota	Plants	Land Plants	NA	AAT	19278	1629	240.5	29
114	Eucalyptus grandis	Eukaryota	Plants	Land Plants	Flooded gum;Rose gum	AAT	405	160.5	92	51
115	Cajanus cajan	Eukaryota	Plants	Land Plants	Pegion pea	AAT	4851	423	72	40
116	Glycine max	Eukaryota	Plants	Land Plants	Soybean;Soya bean	AT	771	218	133	75
117	Phaseolus vulgaris	Eukaryota	Plants	Land Plants	Common bean	AAT	575	150.5	66	36
118	Vigna angularis	Eukaryota	Plants	Land Plants	Adzuki bean	AT	3859	220	61	32
119	Vigna radiata var. radiata	Eukaryota	Plants	Land Plants	Mung bean	AT	159	123	90	69
120	Cicer arietinum	Eukaryota	Plants	Land Plants	Chickpea	ATC	16720	1432	119	59
121	Medicago truncatula	Eukaryota	Plants	Land Plants	Barrelclover;Strong-spined medick;Barrel medic	AT	11256	165	74	46
122	Lupinus angustifolius	Eukaryota	Plants	Land Plants	Narrowleaf lupin;Blue lupin	ACATAT	21671	1633.5	168	51
123	Juglans regia	Eukaryota	Plants	Land Plants	English walnut;Persian walnut;Walnut	AAT	243	101	79	47
124	Fragaria vesca subsp. vesca	Eukaryota	Plants	Land Plants	Wild strawberry;Alpine strawberry;European strawberry	ACGT	262	123	84	35
125	Malus domestica	Eukaryota	Plants	Land Plants	NA	AG	261	122.5	70	43
126	Pyrus x bretschneideri	Eukaryota	Plants	Land Plants	Pear;Pearple;Chinese white pear	AAG	1411	644	372.5	42
127	Prunus mume	Eukaryota	Plants	Land Plants	Plum blossom;Chinese plum;Japnese apricot;Ber	AC	260	143	58	36
128	Prunus persica	Eukaryota	Plants	Land Plants	Peach;Aadoo	AG	183	103.5	70	41
129	Morus notabilis	Eukaryota	Plants	Land Plants	Mulberry	AT	4629	241.5	66	41
130	Ziziphus jujuba	Eukaryota	Plants	Land Plants	Jujube;Red date;Chinese data;Korean date;Indian date	AT	5586	284	195	43
131	Cucumis melo	Eukaryota	Plants	Land Plants	Muskmelon	ACGT	600	172	84	42
132	Cucumis sativus	Eukaryota	Plants	Land Plants	Cucumber	ATC	794	517	172	24
133	Jatropha curcas	Eukaryota	Plants	Land Plants	NA	AT	4711	233	75.5	37
134	Ricinus communis	Eukaryota	Plants	Land Plants	Castorbean;Castor oil;Rendee	ACTG	802	95	67	37
135	Populus euphratica	Eukaryota	Plants	Land Plants	Euphrates poplar;Desert poplar	AAC	8440	292.5	179	44
136	Populus trichocarpa	Eukaryota	Plants	Land Plants	Black cottonwood;Western balsam-poplar	AT	610	86	67	46
137	Vitis vinifera	Eukaryota	Plants	Land Plants	Common grape vine	AAT	585	110	76	45
138	Beta vulgaris subsp. vulgaris	Eukaryota	Plants	Land Plants	NA	ACT	2740	688.5	155	58
139	Capsicum annuum	Eukaryota	Plants	Land Plants	Sweet and chili peppers;Capsicum	AAT	18083	549	125	51
140	Solanum lycopersicum	Eukaryota	Plants	Land Plants	Tomato;Tamatar	AGAT	241	111	78	49
141	Solanum pennellii	Eukaryota	Plants	Land Plants	Wild tomato	AAG	10539	2096.5	75.5	42
142	Solanum tuberosum	Eukaryota	Plants	Land Plants	Potato;Aloo	AAG	4704	909	333.5	31
143	Nicotiana sylvestris	Eukaryota	Plants	Land Plants	Woodland tobacco;Flowering tobacco	AAT	15652	1726.5	539.5	55
144	Nicotiana tabacum	Eukaryota	Plants	Land Plants	Cultivated tobacco	ACT	1828	390	103	72
145	Nicotiana tomentosiformis	Eukaryota	Plants	Land Plants	NA	AAC	6803	498.5	95	59
146	Nicotiana attenuata	Eukaryota	Plants	Land Plants	Coyote tobacco	AG	4322	312	95	74
147	Ipomoea nil	Eukaryota	Plants	Land Plants	Picotee morning glory;Ivy morning glory;Japonese morning glory	ACT	1504	402	197	109
148	Erythranthe guttata	Eukaryota	Plants	Land Plants	Seep mokeyflower;Yellow monkey flower	AAT	657	346.5	212	98
149	Sesamum indicum	Eukaryota	Plants	Land Plants	Sesame;Benne;Til;Nuvvulu	AAT	222	102	47	28
150	Daucus carota subsp. sativus	Eukaryota	Plants	Land Plants	NA	AAT	1019	173	68	40
151	Nelumbo nucifera	Eukaryota	Plants	Land Plants	Sacred lotus;Indian lotus	AAGAG	693	105	86	46
152	Amborella trichopoda	Eukaryota	Plants	Land Plants	NA	ACT	481	183	101	50
153	Selaginella moellendorffii	Eukaryota	Plants	Land Plants	NA	AT	395	160.5	66	28
154	Physcomitrella patens	Eukaryota	Plants	Land Plants	Spreading earth moss	AT	559	88	60	40
155	Chondrus crispus	Eukaryota	Plants	Land Plants	Irish moss;Carrageen moss	AAAAAG	261	45.5	26	16
156	Galdieria sulphuraria	Eukaryota	Plants	Land Plants	NA	AT	48	31.5	19	12
157	Pseudocercospora fijiensis CIRAD86	Eukaryota	Fungi	Ascomycetes	NA	AAT	423	149.5	36	19
158	Baudoinia panamericana UAMH 10762	Eukaryota	Fungi	Ascomycetes	NA	AACCCT	130	41	20	13
159	Sphaerulina musiva SO2202	Eukaryota	Fungi	Ascomycetes	NA	ACT	253	114	43	21
160	Zymoseptoria tritici IPO323	Eukaryota	Fungi	Ascomycetes	NA	ACT	207	71.5	26	15
161	Aureobasidium namibiae CBS 147.97	Eukaryota	Fungi	Ascomycetes	NA	AAG	99	35	19	13
162	Aureobasidium subglaciale EXF-2481	Eukaryota	Fungi	Ascomycetes	NA	AAG	95	43	20	13
163	Neofusicoccum parvum UCRNP2	Eukaryota	Fungi	Ascomycetes	NA	AAGAGG	86	38.5	24	15
164	Diplodia corticola	Eukaryota	Fungi	Ascomycetes	NA	C	151	54	32	18
165	Coniosporium apollinis CBS 100218	Eukaryota	Fungi	Ascomycetes	NA	AACCCT	100	72	20	13
166	Verruconis gallopava	Eukaryota	Fungi	Ascomycetes	NA	AACCCT	101	64	28	14
167	Paraphaeosphaeria sporulosa	Eukaryota	Fungi	Ascomycetes	NA	AAG	98	50.5	21	14
168	Leptosphaeria maculans JN3	Eukaryota	Fungi	Ascomycetes	NA	A	379	79	37	18
169	Parastagonospora nodorum SN15	Eukaryota	Fungi	Ascomycetes	NA	AAT	247	39	21	14
170	Alternaria alternata	Eukaryota	Fungi	Ascomycetes	NA	AACCCT	95	33	19	13
171	Bipolaris maydis ATCC 48331	Eukaryota	Fungi	Ascomycetes	NA	ACCCTC	80	56	29	16
172	Bipolaris sorokiniana ND90Pr	Eukaryota	Fungi	Ascomycetes	NA	ACT	133	53.5	28	15
173	Bipolaris victoriae FI3	Eukaryota	Fungi	Ascomycetes	NA	ACT	98	50.5	27	15
174	Bipolaris oryzae ATCC 44560	Eukaryota	Fungi	Ascomycetes	NA	AC	85	49	28	16
175	Bipolaris zeicola 26-R-13	Eukaryota	Fungi	Ascomycetes	NA	AAAG	70	47	26	15
176	Pyrenophora teres f. teres 0-1	Eukaryota	Fungi	Ascomycetes	NA	ACT	105	44	27	15
177	Pyrenophora tritici-repentis Pt-1C-BFP	Eukaryota	Fungi	Ascomycetes	NA	AAG	113	45.5	25	15
178	Setosphaeria turcica Et28A	Eukaryota	Fungi	Ascomycetes	NA	ACACCT	231	85	41	23
179	Cladophialophora bantiana CBS 173.52	Eukaryota	Fungi	Ascomycetes	NA	AAC	156	74.5	24	14
180	Exophiala mesophila	Eukaryota	Fungi	Ascomycetes	NA	AACCCT	101	47	23	14
181	Rhinocladiella mackenziei CBS 650.93	Eukaryota	Fungi	Ascomycetes	NA	C	86	30	21	14
182	Cladophialophora carrionii CBS 160.54	Eukaryota	Fungi	Ascomycetes	NA	AG	112	76	27	15
183	Exophiala xenobiotica	Eukaryota	Fungi	Ascomycetes	NA	AGGATG	101	43.5	22	14
184	Capronia coronata CBS 617.96	Eukaryota	Fungi	Ascomycetes	NA	AAATGG	99	51.5	26	15
185	Fonsecaea pedrosoi CBS 271.37	Eukaryota	Fungi	Ascomycetes	NA	AACCCT	137	61.5	26	16
186	Exophiala aquamarina CBS 119918	Eukaryota	Fungi	Ascomycetes	NA	AAATAT	95	47	25	15
187	Exophiala dermatitidis NIH/UT8656	Eukaryota	Fungi	Ascomycetes	NA	AACAGG	98	41	23	15
188	Cyphellophora europaea CBS 101466	Eukaryota	Fungi	Ascomycetes	NA	AACCCT	101	48.5	22	14
189	Exophiala oligosperma	Eukaryota	Fungi	Ascomycetes	NA	AACCCT	101	76.5	26	15
190	Exophiala spinifera	Eukaryota	Fungi	Ascomycetes	NA	ACAG	150	74	30	16
191	Capronia epimyces CBS 606.96	Eukaryota	Fungi	Ascomycetes	NA	ACAG	142	94	34	19
192	Fonsecaea multimorphosa CBS 102226	Eukaryota	Fungi	Ascomycetes	NA	AACCCT	170	46.5	24	14
193	Cladophialophora immunda	Eukaryota	Fungi	Ascomycetes	NA	AAG	136	59	26	15
194	Fonsecaea erecta	Eukaryota	Fungi	Ascomycetes	NA	AAG	145	51	29	16
195	Cladophialophora yegresii CBS 114405	Eukaryota	Fungi	Ascomycetes	NA	ACAG	158	47	22	14
196	Phialophora attae	Eukaryota	Fungi	Ascomycetes	NA	AACCCT	114	26	17	13
197	Cladophialophora psammophila CBS 110553	Eukaryota	Fungi	Ascomycetes	NA	C	113	60	29	15
198	Endocarpon pusillum Z07020	Eukaryota	Fungi	Ascomycetes	NA	AAGGAG	750	116.5	27	15
199	Aspergillus fumigatus Af293	Eukaryota	Fungi	Ascomycetes	NA	AAT	166	47	23	14
200	Aspergillus aculeatus ATCC 16872	Eukaryota	Fungi	Ascomycetes	NA	AAAT	225	65	31	17
201	Talaromyces marneffei ATCC 18224	Eukaryota	Fungi	Ascomycetes	NA	AACCCT	307	91	27	14
202	Penicillium rubens Wisconsin 54-1255	Eukaryota	Fungi	Ascomycetes	NA	AACAGC	161	35	22	14
203	Talaromyces stipitatus ATCC 10500	Eukaryota	Fungi	Ascomycetes	NA	AAC	133	40	24	14
204	Aspergillus niger CBS 513.88	Eukaryota	Fungi	Ascomycetes	NA	AAC	264	55.5	26	15
205	Talaromyces atroroseus	Eukaryota	Fungi	Ascomycetes	NA	AAT	98	45	28	16
206	Aspergillus oryzae RIB40	Eukaryota	Fungi	Ascomycetes	NA	ACT	261	57	27	15
207	Penicillium expansum	Eukaryota	Fungi	Ascomycetes	NA	AG	546	39.5	22	14
208	Aspergillus nomius NRRL 13137	Eukaryota	Fungi	Ascomycetes	NA	AAG	92	40	23	14
209	Penicillium digitatum Pd1	Eukaryota	Fungi	Ascomycetes	NA	AG	119	39	20	13
210	Rasamsonia emersonii CBS 393.64	Eukaryota	Fungi	Ascomycetes	NA	AAT	253	56.5	26	17
211	Aspergillus flavus NRRL3357	Eukaryota	Fungi	Ascomycetes	NA	ACT	214	46.5	25	14
212	Aspergillus nidulans FGSC A4	Eukaryota	Fungi	Ascomycetes	NA	AACCCT	133	41	20	13
213	Aspergillus fischeri NRRL 181	Eukaryota	Fungi	Ascomycetes	NA	ATC	199	38	21	14
214	Aspergillus terreus NIH2624	Eukaryota	Fungi	Ascomycetes	NA	AAAAT	319	37	21	14
215	Aspergillus clavatus NRRL 1	Eukaryota	Fungi	Ascomycetes	NA	ACT	192	49	30	17
216	Uncinocarpus reesii 1704	Eukaryota	Fungi	Ascomycetes	NA	AAT	227	30	18	13
217	Paracoccidioides lutzii Pb01	Eukaryota	Fungi	Ascomycetes	NA	ACAT	263	70.5	39	21
218	Arthroderma otae CBS 113480	Eukaryota	Fungi	Ascomycetes	NA	AACCCT	76	34	22	14
219	Trichophyton rubrum CBS 118892	Eukaryota	Fungi	Ascomycetes	NA	AAT	341	53	30	16
220	Coccidioides immitis RS	Eukaryota	Fungi	Ascomycetes	NA	AACCCT	181	47	30	16
221	Paracoccidioides brasiliensis Pb18	Eukaryota	Fungi	Ascomycetes	NA	AAT	386	79	41	20
222	Blastomyces gilchristii SLH14081	Eukaryota	Fungi	Ascomycetes	NA	ACAT	155	67	41	23
223	Trichophyton verrucosum HKI 0517	Eukaryota	Fungi	Ascomycetes	NA	AACCCT	100	39	26	16
224	Histoplasma capsulatum NAm1	Eukaryota	Fungi	Ascomycetes	NA	ACT	312	57.5	38	20
225	Coccidioides posadasii C735 delta SOWgp	Eukaryota	Fungi	Ascomycetes	NA	AAATAT	213	44.5	30	16
226	Trichophyton benhamiae CBS 112371	Eukaryota	Fungi	Ascomycetes	NA	ACCATC	137	54	29	16
227	Nannizzia gypsea CBS 118893	Eukaryota	Fungi	Ascomycetes	NA	AAG	84	35	24	15
228	Marssonina brunnea f. sp. 'multigermtubi' MB_m1	Eukaryota	Fungi	Ascomycetes	NA	AAAT	230	87	47	25
229	Botrytis cinerea B05.10	Eukaryota	Fungi	Ascomycetes	NA	AAT	350	98.5	36	20
230	Sclerotinia sclerotiorum 1980 UF-70	Eukaryota	Fungi	Ascomycetes	NA	AAAACT	339	139	31	18
231	Glarea lozoyensis ATCC 20868	Eukaryota	Fungi	Ascomycetes	NA	ACTCT	186	29	19	14
232	Phialocephala scopiformis	Eukaryota	Fungi	Ascomycetes	NA	AACTC	98	41	26	15
233	Pseudogymnoascus verrucosus	Eukaryota	Fungi	Ascomycetes	NA	AAGTAG	129	33	22	15
234	Pseudogymnoascus destructans 20631-21	Eukaryota	Fungi	Ascomycetes	NA	AACCT	255	87	26	15
235	Arthrobotrys oligospora ATCC 24927	Eukaryota	Fungi	Ascomycetes	NA	AAAAT	256	67	31	19
236	Dactylellina haptotyla CBS 200.50	Eukaryota	Fungi	Ascomycetes	NA	AACCCT	163	45.5	28	17
237	Tuber melanosporum	Eukaryota	Fungi	Ascomycetes	NA	AACCCT	314	68	30	19
238	Verticillium alfalfae VaMs.102	Eukaryota	Fungi	Ascomycetes	NA	AACCCT	154	42.5	25	15
239	Colletotrichum gloeosporioides Nara gc5	Eukaryota	Fungi	Ascomycetes	NA	AAG	940	43.5	26	16
240	Colletotrichum fioriniae PJ7	Eukaryota	Fungi	Ascomycetes	NA	AGG	47	34	29	17
241	Verticillium dahliae VdLs.17	Eukaryota	Fungi	Ascomycetes	NA	AT	304	56	28	16
242	Colletotrichum higginsianum IMI 349063	Eukaryota	Fungi	Ascomycetes	NA	AAC	289	77	35	21
243	Colletotrichum graminicola M1.001	Eukaryota	Fungi	Ascomycetes	NA	AAG	245	81.5	38	20
244	Fusarium pseudograminearum CS3096	Eukaryota	Fungi	Ascomycetes	NA	AAAT	102	36.5	23	15
245	Metarhizium robertsii ARSEF 23	Eukaryota	Fungi	Ascomycetes	NA	A	567	28	23	15
246	Purpureocillium lilacinum	Eukaryota	Fungi	Ascomycetes	NA	AAT	143	53	27	17
247	Fusarium graminearum PH-1	Eukaryota	Fungi	Ascomycetes	NA	AACCCT	143	34	23	15
248	Trichoderma reesei QM6a	Eukaryota	Fungi	Ascomycetes	NA	AAAT	416	71	32	19
249	Trichoderma atroviride IMI 206040	Eukaryota	Fungi	Ascomycetes	NA	AAAT	429	45.5	26	16
250	Isaria fumosorosea ARSEF 2679	Eukaryota	Fungi	Ascomycetes	NA	ACAT	863	48	29	16
251	Beauveria bassiana ARSEF 2860	Eukaryota	Fungi	Ascomycetes	NA	AAT	283	52	28	16
252	Cordyceps militaris CM01	Eukaryota	Fungi	Ascomycetes	NA	AAAT	190	43	23	15
253	Fusarium verticillioides 7600	Eukaryota	Fungi	Ascomycetes	NA	AAAAT	334	48	26	15
254	Pochonia chlamydosporia 170	Eukaryota	Fungi	Ascomycetes	NA	AACCCT	95	42	25	15
255	Metarhizium brunneum ARSEF 3297	Eukaryota	Fungi	Ascomycetes	NA	AAC	569	38	24.5	15
256	Fusarium oxysporum f. sp. lycopersici 4287	Eukaryota	Fungi	Ascomycetes	NA	AAATAG	245	44	27	16
257	Trichoderma gamsii	Eukaryota	Fungi	Ascomycetes	NA	AGAGCC	79	54	26	16
258	Metarhizium acridum CQMa 102	Eukaryota	Fungi	Ascomycetes	NA	AAAG	608	91	27	15
259	Metarhizium majus ARSEF 297	Eukaryota	Fungi	Ascomycetes	NA	AACACC	590	40	27	15
260	Trichoderma virens Gv29-8	Eukaryota	Fungi	Ascomycetes	NA	AAAAAG	494	51	27	16
261	Nectria haematococca mpVI 77-13-4	Eukaryota	Fungi	Ascomycetes	NA	AACCCT	239	40.5	24	16
262	Scedosporium apiospermum	Eukaryota	Fungi	Ascomycetes	NA	AAAAAT	57	39	33	17
263	Gaeumannomyces tritici R3-111a-1	Eukaryota	Fungi	Ascomycetes	NA	AAAT	259	98	33	18
264	Magnaporthe oryzae 70-15	Eukaryota	Fungi	Ascomycetes	NA	AGCCTG	523	83	31	17
265	Sporothrix schenckii 1099-18	Eukaryota	Fungi	Ascomycetes	NA	AAAAT	128	45.5	26	16
266	Grosmannia clavigera kw1407	Eukaryota	Fungi	Ascomycetes	NA	AACAGC	306	57	26	15
267	Podospora anserina S mat+	Eukaryota	Fungi	Ascomycetes	NA	AAT	244	73	32	16
268	Chaetomium thermophilum var. thermophilum DSM 1495	Eukaryota	Fungi	Ascomycetes	NA	ACGT	183	65.5	34	15
269	Thielavia terrestris NRRL 8126	Eukaryota	Fungi	Ascomycetes	NA	AAT	398	91.5	32	17
270	Neurospora crassa OR74A	Eukaryota	Fungi	Ascomycetes	NA	AACCCT	315	121.5	42	20
271	Neurospora tetrasperma FGSC 2508	Eukaryota	Fungi	Ascomycetes	NA	AAT	287	106	35	18
272	Chaetomium globosum CBS 148.51	Eukaryota	Fungi	Ascomycetes	NA	AGCCTG	309	47	27	16
273	Sordaria macrospora	Eukaryota	Fungi	Ascomycetes	NA	ACACT	190	64	31	18
274	Thermothelomyces thermophila ATCC 42464	Eukaryota	Fungi	Ascomycetes	NA	AAT	317	81	35	19
275	Phaeoacremonium minimum UCRPA7	Eukaryota	Fungi	Ascomycetes	NA	ACAGG	60	35	25	16
276	Pestalotiopsis fici W106-1	Eukaryota	Fungi	Ascomycetes	NA	ACCT	151	43	26	16
277	Eutypa lata UCREL1	Eukaryota	Fungi	Ascomycetes	NA	AAATAT	77	47	32	20
278	Xylona heveae TC161	Eukaryota	Fungi	Ascomycetes	NA	AAAG	116	54.5	28	15
279	Tetrapisispora phaffii CBS 4417	Eukaryota	Fungi	Ascomycetes	NA	AAC	146	39	21	13
280	Naumovozyma castellii CBS 4309	Eukaryota	Fungi	Ascomycetes	NA	ATC	101	32	20	13
281	Babjeviella inositovora NRRL Y-12698	Eukaryota	Fungi	Ascomycetes	NA	AG	86	29	16	12
282	Sugiyamaella lignohabitans	Eukaryota	Fungi	Ascomycetes	NA	ACT	164	35	21	13
283	Saccharomyces eubayanus	Eukaryota	Fungi	Ascomycetes	NA	AGGATG	97	41	23	13
284	Ascoidea rubescens DSM 1968	Eukaryota	Fungi	Ascomycetes	NA	AAT	179	95	52	20
285	Debaryomyces fabryi	Eukaryota	Fungi	Ascomycetes	NA	AAG	59	27	17	12
286	Candida tropicalis MYA-3404	Eukaryota	Fungi	Ascomycetes	NA	AAGCAG	167	43	27	17
287	Clavispora lusitaniae ATCC 42720	Eukaryota	Fungi	Ascomycetes	NA	ACAGAG	379	28	17	12
288	[Candida] auris	Eukaryota	Fungi	Ascomycetes	NA	C	307	49	28	13
289	Pichia membranifaciens NRRL Y-2026	Eukaryota	Fungi	Ascomycetes	NA	AACAGC	194	43	23	13
290	Torulaspora delbrueckii	Eukaryota	Fungi	Ascomycetes	NA	ACAGGC	94	26.5	15	12
291	Komagataella phaffii GS115	Eukaryota	Fungi	Ascomycetes	NA	ACCACT	44	23.5	15	12
292	Yarrowia lipolytica CLIB122	Eukaryota	Fungi	Ascomycetes	NA	AACAG	306	59	27	14
293	Meyerozyma guilliermondii ATCC 6260	Eukaryota	Fungi	Ascomycetes	NA	AAG	73	23	15	12
294	Debaryomyces hansenii CBS767	Eukaryota	Fungi	Ascomycetes	NA	AAGCAG	100	29	17	12
295	Candida dubliniensis CD36	Eukaryota	Fungi	Ascomycetes	NA	AAC	161	55	33	20
296	Lodderomyces elongisporus NRRL YB-4239	Eukaryota	Fungi	Ascomycetes	NA	AAGCAC	240	79.5	38	22
297	Tetrapisispora blattae CBS 6284	Eukaryota	Fungi	Ascomycetes	NA	AAAAGC	170	66	29	15
298	Eremothecium sinecaudum	Eukaryota	Fungi	Ascomycetes	NA	AAC	99	29	16	12
299	Eremothecium gossypii ATCC 10895	Eukaryota	Fungi	Ascomycetes	NA	AAAAT	117	27	16	12
300	Wickerhamomyces ciferrii	Eukaryota	Fungi	Ascomycetes	NA	AAC	111	32.5	20	14
301	Ogataea parapolymorpha DL-1	Eukaryota	Fungi	Ascomycetes	NA	AAG	65	21	14	12
302	Candida tanzawaensis NRRL Y-17324	Eukaryota	Fungi	Ascomycetes	NA	AAG	76	25	17	12
303	Candida orthopsilosis	Eukaryota	Fungi	Ascomycetes	NA	A	605	40	22	13
304	Candida albicans SC5314	Eukaryota	Fungi	Ascomycetes	NA	AAGAGG	101	44	28	17
305	Kazachstania africana CBS 2517	Eukaryota	Fungi	Ascomycetes	NA	AAC	150	36	19	12
306	Lachancea thermotolerans CBS 6340	Eukaryota	Fungi	Ascomycetes	NA	AACAGC	107	28	16	12
307	Kluyveromyces lactis	Eukaryota	Fungi	Ascomycetes	NA	ACCATC	98	37	20	12
308	Eremothecium cymbalariae DBVPG#7215	Eukaryota	Fungi	Ascomycetes	NA	AAAT	266	41	20	13
309	Metschnikowia bicuspidata var. bicuspidata NRRL YB-4993	Eukaryota	Fungi	Ascomycetes	NA	AG	156	41.5	17	12
310	Spathaspora passalidarum NRRL Y-27907	Eukaryota	Fungi	Ascomycetes	NA	AAC	112	32	22	14
311	Hyphopichia burtonii NRRL Y-1933	Eukaryota	Fungi	Ascomycetes	NA	ACT	95	46.5	24	14
312	[Candida] tenuis ATCC 10573	Eukaryota	Fungi	Ascomycetes	NA	AAC	74	27	16	12
313	Scheffersomyces stipitis CBS 6054	Eukaryota	Fungi	Ascomycetes	NA	AGAGCC	80	28	17	13
314	Zygosaccharomyces rouxii	Eukaryota	Fungi	Ascomycetes	NA	AAT	113	37	22	13
315	Cyberlindnera jadinii NRRL Y-1542	Eukaryota	Fungi	Ascomycetes	NA	ACT	96	39.5	20	13
316	Naumovozyma dairenensis CBS 421	Eukaryota	Fungi	Ascomycetes	NA	ATATC	160	53	29	15
317	Saccharomyces cerevisiae S288C	Eukaryota	Fungi	Ascomycetes	NA	AAT	108	35	22	13
318	[Candida] glabrata	Eukaryota	Fungi	Ascomycetes	NA	ACCATC	66	32	19	13
319	Wickerhamomyces anomalus NRRL Y-366-8	Eukaryota	Fungi	Ascomycetes	NA	AATAC	93	28.5	18	13
320	Ogataea polymorpha	Eukaryota	Fungi	Ascomycetes	NA	AAG	93	21	14	12
321	Vanderwaltozyma polyspora DSM 70294	Eukaryota	Fungi	Ascomycetes	NA	AATAT	183	53	30	16
322	Saitoella complicata NRRL Y-17804	Eukaryota	Fungi	Ascomycetes	NA	AACCCT	155	118.5	19	13
323	Pneumocystis murina B123	Eukaryota	Fungi	Ascomycetes	NA	AAGCCT	269	23	16	12
324	Pneumocystis jirovecii RU7	Eukaryota	Fungi	Ascomycetes	NA	AACCCT	105	23	16	12
325	Pneumocystis carinii B80	Eukaryota	Fungi	Ascomycetes	NA	AACCCT	86	27	18	13
326	Schizosaccharomyces japonicus yFS275	Eukaryota	Fungi	Ascomycetes	NA	AAGACT	119	29	18	12
327	Schizosaccharomyces pombe	Eukaryota	Fungi	Ascomycetes	NA	AAC	84	29	19	13
328	Schizosaccharomyces cryophilus OY26	Eukaryota	Fungi	Ascomycetes	NA	AAGTCT	77	32	19	13
329	Schizosaccharomyces octosporus yFS286	Eukaryota	Fungi	Ascomycetes	NA	AATAG	66	35	21	13
330	Agaricus bisporus var. bisporus H97	Eukaryota	Fungi	Basidiomycetes	NA	AG	68	31	21	14
331	Laccaria bicolor S238N-H82	Eukaryota	Fungi	Basidiomycetes	NA	AAAAAG	184	43	25	16
332	Agaricus bisporus var. burnettii JB137-S8	Eukaryota	Fungi	Basidiomycetes	NA	AG	87	29	20	14
333	Moniliophthora roreri MCA 2997	Eukaryota	Fungi	Basidiomycetes	NA	AACCAG	77	36	22	15
334	Schizophyllum commune H4-8	Eukaryota	Fungi	Basidiomycetes	NA	AACCCT	191	31.5	19	14
335	Coprinopsis cinerea okayama7#130	Eukaryota	Fungi	Basidiomycetes	NA	AACCCT	209	32	20	14
336	Serpula lacrymans var. lacrymans S7.9	Eukaryota	Fungi	Basidiomycetes	NA	AACCTT	81	34	20	14
337	Coniophora puteana RWD-64-598 SS2	Eukaryota	Fungi	Basidiomycetes	NA	AACCCT	180	36	22	15
338	Auricularia subglabra TFB-10046 SS5	Eukaryota	Fungi	Basidiomycetes	NA	AACCT	157	39	26	16
339	Punctularia strigosozonata HHB-11173 SS5	Eukaryota	Fungi	Basidiomycetes	NA	AACCCT	223	39	22	14
340	Gloeophyllum trabeum ATCC 11539	Eukaryota	Fungi	Basidiomycetes	NA	AACCCT	184	31	20	14
341	Fomitiporia mediterranea MF3/22	Eukaryota	Fungi	Basidiomycetes	NA	AAGGAG	212	73.5	25	15
342	Postia placenta Mad-698-R	Eukaryota	Fungi	Basidiomycetes	NA	AACCT	321	52	22	15
343	Dichomitus squalens LYAD-421 SS1	Eukaryota	Fungi	Basidiomycetes	NA	AACCCT	158	36	20	14
344	Fibroporia radiculosa	Eukaryota	Fungi	Basidiomycetes	NA	AACGAC	52	32	19	13
345	Phanerochaete carnosa HHB-10118-sp	Eukaryota	Fungi	Basidiomycetes	NA	AGCAGG	107	34	21	14
346	Trametes versicolor FP-101664 SS1	Eukaryota	Fungi	Basidiomycetes	NA	AACCCT	131	37	19	14
347	Stereum hirsutum FP-91666 SS1	Eukaryota	Fungi	Basidiomycetes	NA	AACCT	194	44	25	16
348	Heterobasidion irregulare TC 32-1	Eukaryota	Fungi	Basidiomycetes	NA	AAT	303	52	28	16
349	Kwoniella pini CBS 10737	Eukaryota	Fungi	Basidiomycetes	NA	AACAGC	143	38	23	14
350	Kwoniella mangroviensis CBS 8507	Eukaryota	Fungi	Basidiomycetes	NA	AATCAT	98	36	22	15
351	Tsuchiyaea wingfieldii CBS 7118	Eukaryota	Fungi	Basidiomycetes	NA	ACAT	96	35	21	14
352	Tremella mesenterica DSM 1558	Eukaryota	Fungi	Basidiomycetes	NA	AG	201	57	23	15
353	Cryptococcus neoformans var. neoformans B-3501A	Eukaryota	Fungi	Basidiomycetes	NA	AACAGC	259	29	19	13
354	Kwoniella dejecticola CBS 10117	Eukaryota	Fungi	Basidiomycetes	NA	AAAGC	160	72.5	24	16
355	Cryptococcus neoformans var. grubii H99	Eukaryota	Fungi	Basidiomycetes	NA	AAAT	278	33	19.5	13
356	Cryptococcus amylolentus CBS 6039	Eukaryota	Fungi	Basidiomycetes	NA	AAGGGG	271	31	19	14
357	Cryptococcus gattii WM276	Eukaryota	Fungi	Basidiomycetes	NA	AAT	436	36	20	13
358	Kwoniella bestiolae CBS 10118	Eukaryota	Fungi	Basidiomycetes	NA	A	97	38	22	15
359	Cryptococcus neoformans var. neoformans JEC21	Eukaryota	Fungi	Basidiomycetes	NA	AAGGAG	316	29	19	13
360	Cutaneotrichosporon oleaginosus	Eukaryota	Fungi	Basidiomycetes	NA	C	87	57.5	28	15
361	Trichosporon asahii var. asahii CBS 2479	Eukaryota	Fungi	Basidiomycetes	NA	AC	484	29	19	14
362	Wallemia ichthyophaga EXF-994	Eukaryota	Fungi	Basidiomycetes	NA	AAC	56	26.5	18	13
363	Wallemia mellicola CBS 633.66	Eukaryota	Fungi	Basidiomycetes	NA	AACCT	71	24.5	16	12
364	Rhodotorula graminis WP1	Eukaryota	Fungi	Basidiomycetes	NA	AGCAGG	219	58	27	18
365	Rhodotorula toruloides NP11	Eukaryota	Fungi	Basidiomycetes	NA	AG	274	27	19	14
366	Mixia osmundae IAM 14324	Eukaryota	Fungi	Basidiomycetes	NA	AACCCT	95	35	16	12
367	Puccinia graminis f. sp. tritici CRL 75-36-700-3	Eukaryota	Fungi	Basidiomycetes	NA	AAAAC	354	124	34	20
368	Melampsora larici-populina 98AG31	Eukaryota	Fungi	Basidiomycetes	NA	AACCCT	395	59.5	28	18
369	Tilletiaria anomala UBC 951	Eukaryota	Fungi	Basidiomycetes	NA	AACCCT	95	36.5	19	14
370	Malassezia sympodialis ATCC 42132	Eukaryota	Fungi	Basidiomycetes	NA	AGGATG	194	23	16	12
371	Malassezia pachydermatis	Eukaryota	Fungi	Basidiomycetes	NA	ACTCTG	89	26	17	12
372	Malassezia globosa CBS 7966	Eukaryota	Fungi	Basidiomycetes	NA	AACACT	158	35	19	12
373	Ustilago maydis 521	Eukaryota	Fungi	Basidiomycetes	NA	AACCCT	373	60	29	14
374	Pseudozyma hubeiensis SY62	Eukaryota	Fungi	Basidiomycetes	NA	ACAGGG	71	53	21	14
375	Kalmanozyma brasiliensis GHG001	Eukaryota	Fungi	Basidiomycetes	NA	AACCCT	105	47	18	13
376	Anthracocystis flocculosa PF-1	Eukaryota	Fungi	Basidiomycetes	NA	AGAGG	189	83.5	39	21
377	Moesziomyces antarcticus	Eukaryota	Fungi	Basidiomycetes	NA	AAAAAG	136	74.5	26	14
378	Encephalitozoon romaleae SJ-2008	Eukaryota	Fungi	Microsporidia	NA	AAAAG	19	15	12	12
379	Encephalitozoon intestinalis ATCC 50506	Eukaryota	Fungi	Microsporidia	NA	ACGATG	24	15	12	12
380	Nosema ceranae BRL01	Eukaryota	Fungi	Microsporidia	NA	AATAGT	225	20	15	12
381	Vittaforma corneae ATCC 50505	Eukaryota	Fungi	Microsporidia	NA	AAAT	22	15	13	12
382	Encephalitozoon cuniculi GB-M1	Eukaryota	Fungi	Microsporidia	NA	AAAC	23	15.5	12	12
383	Enterocytozoon bieneusi H348	Eukaryota	Fungi	Microsporidia	NA	C	418	24	15	12
384	Encephalitozoon hellem ATCC 50504	Eukaryota	Fungi	Microsporidia	NA	ACTC	23	15	12	12
385	Nematocida parisii ERTm1	Eukaryota	Fungi	Microsporidia	NA	AAAAAT	28	18	14	12
386	Ordospora colligata OC4	Eukaryota	Fungi	Microsporidia	NA	AAAAAG	42	16	13	12
387	Mitosporidium daphniae	Eukaryota	Fungi	Microsporidia	NA	AACCCT	107	26	15	12
388	Vavraia culicis subsp. floridensis	Eukaryota	Fungi	Microsporidia	NA	AAAGT	342	15	13	12
389	Priapulus caudatus	Eukaryota	Invertebrates	Roundworms	Priapulid worm	A	395	225	162	103
390	Brugia malayi	Eukaryota	Invertebrates	Roundworms	Filarial nematode worm	AGAT	896	275.5	73	27
391	Loa loa	Eukaryota	Invertebrates	Roundworms	Eye worm	AAT	411	285.5	167	41
392	Caenorhabditis briggsae	Eukaryota	Invertebrates	Roundworms	NA	AAG	243	112	49	18
393	Caenorhabditis elegans	Eukaryota	Invertebrates	Roundworms	NA	AT	675	125.5	36	18
394	Caenorhabditis remanei	Eukaryota	Invertebrates	Roundworms	NA	ACAG	453	77.5	28	18
395	Necator americanus	Eukaryota	Invertebrates	Roundworms	Human hookworm	ACACTC	221	97	45	20
396	Trichinella spiralis	Eukaryota	Invertebrates	Roundworms	NA	AATAT	493	80.5	44	24
397	Acyrthosiphon pisum	Eukaryota	Invertebrates	Insects	Pea aphid	AACCT	444	128.5	70	35
398	Diuraphis noxia	Eukaryota	Invertebrates	Insects	Russian wheat aphid	AC	103	73	45	29
399	Bemisia tabaci	Eukaryota	Invertebrates	Insects	Silverleaf whitefly;Whitefly;Sweetpotato whitefly	AAT	7813	117	80	47
400	Diaphorina citri	Eukaryota	Invertebrates	Insects	Asian citrus psyllid	ACTC	9607	1357.5	293.5	72
401	Cimex lectularius	Eukaryota	Invertebrates	Insects	Bed bug	AGAT	151	95	82	56
402	Halyomorpha halys	Eukaryota	Invertebrates	Insects	Brown marmorated stink bug	AT	11698	95	65	35
403	Pediculus humanus corporis	Eukaryota	Invertebrates	Insects	NA	AAT	774	328.5	100	60
404	Galendromus occidentalis	Eukaryota	Invertebrates	Insects	Western predatory mite	AACCT	442	187.5	28	17
405	Aedes aegypti	Eukaryota	Invertebrates	Insects	Yellowfever mosquito	AATCTG	2234	586	179.5	49
406	Aedes albopictus	Eukaryota	Invertebrates	Insects	Asian tiger musquito	AGAT	10513	3691	1066	263
407	Anopheles gambiae str. PEST	Eukaryota	Invertebrates	Insects	NA	AATATG	607	325	147	49
408	Culex quinquefasciatus	Eukaryota	Invertebrates	Insects	Southern house musquito	AACCAG	1393	677	328	38
409	Bactrocera cucurbitae	Eukaryota	Invertebrates	Insects	Melon fruit fly	AAAAT	283	99	83	26
410	Bactrocera dorsalis	Eukaryota	Invertebrates	Insects	Oriental fruit fly	AAAAT	323	90.5	34	21
411	Bactrocera latifrons	Eukaryota	Invertebrates	Insects	Malaysian fruit fly	AAT	123	95	85	34
412	Bactrocera oleae	Eukaryota	Invertebrates	Insects	Olive fruit fly	A	506	110	42	24
413	Rhagoletis zephyria	Eukaryota	Invertebrates	Insects	Snow berry friutfly	AAATAT	7472	690.5	107	45
414	Ceratitis capitata	Eukaryota	Invertebrates	Insects	Mediterranian fruitfly	AAAAT	39497	104	97	80
415	Drosophila ananassae	Eukaryota	Invertebrates	Insects	NA	ACAG	521	149	39	24
416	Drosophila bipectinata	Eukaryota	Invertebrates	Insects	NA	AACATT	444	170	29	21
417	Drosophila biarmipes	Eukaryota	Invertebrates	Insects	NA	AACTAT	596	194	37	21
418	Drosophila suzukii	Eukaryota	Invertebrates	Insects	Spotted wing fruit fly	ACAG	18595	429	31	22
419	Drosophila takahashii	Eukaryota	Invertebrates	Insects	NA	AAT	660	266.5	54	21
420	Drosophila eugracilis	Eukaryota	Invertebrates	Insects	NA	AAAACT	920	299.5	66	25
421	Drosophila elegans	Eukaryota	Invertebrates	Insects	NA	AAAT	545	194.5	44	25
422	Drosophila rhopaloa	Eukaryota	Invertebrates	Insects	NA	ACGT	523	55	31	22
423	Drosophila erecta	Eukaryota	Invertebrates	Insects	NA	ACATAT	708	235	49	24
424	Drosophila yakuba	Eukaryota	Invertebrates	Insects	NA	AAT	786	159	36	23
425	Drosophila melanogaster	Eukaryota	Invertebrates	Insects	Fruitfly	ACTGGG	1969	202.5	48	24
426	Drosophila sechellia	Eukaryota	Invertebrates	Insects	NA	AATACT	709	213	55	22
427	Drosophila simulans	Eukaryota	Invertebrates	Insects	NA	AAT	185	62	30	21
428	Drosophila ficusphila	Eukaryota	Invertebrates	Insects	NA	AGAT	398	61	33	23
429	Drosophila kikkawai	Eukaryota	Invertebrates	Insects	NA	ACGT	870	107.5	36	23
430	Drosophila miranda	Eukaryota	Invertebrates	Insects	NA	ATGCCC	258	73	45	29
431	Drosophila persimilis	Eukaryota	Invertebrates	Insects	NA	AACTAT	573	68	42	29
432	Drosophila pseudoobscura pseudoobscura	Eukaryota	Invertebrates	Insects	NA	ACTCCT	278	59.5	39	28
433	Drosophila willistoni	Eukaryota	Invertebrates	Insects	NA	AAATAC	985	199.5	58	31
434	Drosophila arizonae	Eukaryota	Invertebrates	Insects	NA	AGATAT	372	226.5	101	37
435	Drosophila mojavensis	Eukaryota	Invertebrates	Insects	NA	ACAGAT	1696	568	185	41
436	Drosophila navojoa	Eukaryota	Invertebrates	Insects	NA	ACAGAT	339	184.5	100	38
437	Drosophila virilis	Eukaryota	Invertebrates	Insects	NA	ACAGAT	1430	531.5	152	40
438	Drosophila grimshawi	Eukaryota	Invertebrates	Insects	NA	ACATAT	852	196	66	35
439	Drosophila busckii	Eukaryota	Invertebrates	Insects	NA	AAATAT	9940	84	48	30
440	Musca domestica	Eukaryota	Invertebrates	Insects	Housefly	AAT	173	109	76.5	35
441	Stomoxys calcitrans	Eukaryota	Invertebrates	Insects	Stable fly	AAAAT	147	97	87	43
442	Bombyx mori	Eukaryota	Invertebrates	Insects	Silk moth	ACAGG	646	190.5	79	30
443	Papilio machaon	Eukaryota	Invertebrates	Insects	Old world swallowtail butterfly	A	17852	366.5	35	22
444	Papilio xuthus	Eukaryota	Invertebrates	Insects	Asian swallowtail butterfly	AATAT	162	127	63.5	21
445	Papilio polytes	Eukaryota	Invertebrates	Insects	Common mormon;Swallowtail butterfly	ACATAT	96	84.5	40	20
446	Amyelois transitella	Eukaryota	Invertebrates	Insects	Navel orangeworm moth	AC	4855	296	64	25
447	Plutella xylostella	Eukaryota	Invertebrates	Insects	Diamondback moth	AATAG	1401	353	63	29
448	Dendroctonus ponderosae	Eukaryota	Invertebrates	Insects	Mountain pine beetle	AC	406	36	24	17
449	Aethina tumida	Eukaryota	Invertebrates	Insects	Small hive beetle	AACCT	1090	243	74	35
450	Anoplophora glabripennis	Eukaryota	Invertebrates	Insects	Asian long-horned beetle	AATT	384	107.5	85	27
451	Tribolium castaneum	Eukaryota	Invertebrates	Insects	Red flour beetle;Flour beetle	AAT	586	222	80	21
452	Agrilus planipennis	Eukaryota	Invertebrates	Insects	Emerald ash borer	AT	1428	82	31	20
453	Nicrophorus vespilloides	Eukaryota	Invertebrates	Insects	Burying beetle	AATAGT	146	39.5	25	19
454	Apis cerana	Eukaryota	Invertebrates	Insects	Indian honeybee	AAT	603	160.5	54	32
455	Apis mellifera	Eukaryota	Invertebrates	Insects	Western honey bee	AACAGT	552	148.5	73	45
456	Apis dorsata	Eukaryota	Invertebrates	Insects	Giant honeybee	AT	2472	156	60	38
457	Apis florea	Eukaryota	Invertebrates	Insects	Dwarf honeybee	AT	235	146.5	91	45
458	Eufriesea mexicana	Eukaryota	Invertebrates	Insects	Euglossine bee	ACAT	9673	206	62	35
459	Bombus impatiens	Eukaryota	Invertebrates	Insects	Bumblebee	AG	2266	728.5	469	30.5
460	Bombus terrestris	Eukaryota	Invertebrates	Insects	Buff-tailed bumblebee	AACAAT	306	133	56	28
461	Ceratina calcarata	Eukaryota	Invertebrates	Insects	Small carpenter bee	AATGAT	577	109	49	25
462	Habropoda laboriosa	Eukaryota	Invertebrates	Insects	Southeastern blueberry bee	AAGAG	8913	171	56.5	28
463	Dufourea novaeangliae	Eukaryota	Invertebrates	Insects	NA	AT	332	112	58	29
464	Atta cephalotes	Eukaryota	Invertebrates	Insects	Leafcutter ant	ACG	442	204.5	141	72
465	Atta colombica	Eukaryota	Invertebrates	Insects	Leafcutter ant	ACAT	883	146.5	82	57
466	Acromyrmex echinatior	Eukaryota	Invertebrates	Insects	Panamanian leafcutter ant	ACAT	866	204.5	73	44
467	Trachymyrmex cornetzi	Eukaryota	Invertebrates	Insects	NA	AT	425	107.5	65	42
468	Trachymyrmex septentrionalis	Eukaryota	Invertebrates	Insects	NA	ACGC	2485	175.5	73	49
469	Trachymyrmex zeteki	Eukaryota	Invertebrates	Insects	NA	AT	225	101	65	40
470	Cyphomyrmex costatus	Eukaryota	Invertebrates	Insects	NA	AT	4789	134.5	65	43
471	Vollenhovia emeryi	Eukaryota	Invertebrates	Insects	NA	ACGT	862	210	81	39
472	Wasmannia auropunctata	Eukaryota	Invertebrates	Insects	Electric ant;Little fire ant	ACGT	693	163	88	45
473	Pogonomyrmex barbatus	Eukaryota	Invertebrates	Insects	Red harvester ant	ACGT	443	188.5	121	64
474	Monomorium pharaonis	Eukaryota	Invertebrates	Insects	Pharaoh ant	AAAATT	208	111	87.5	54
475	Solenopsis invicta	Eukaryota	Invertebrates	Insects	Red imported fire ant	AGCCCG	300	153.5	89	47
476	Dinoponera quadriceps	Eukaryota	Invertebrates	Insects	South american ant	A	968	624	59	37
477	Harpegnathos saltator	Eukaryota	Invertebrates	Insects	Jerdonâ€™s jumping ant	AACG	4684	551.5	191	36
478	Camponotus floridanus	Eukaryota	Invertebrates	Insects	Carpenter ant	ACT	8041	486	151.5	30
479	Cerapachys biroi	Eukaryota	Invertebrates	Insects	Clonal raider ant	AC	3521	202.5	56	27
480	Linepithema humile	Eukaryota	Invertebrates	Insects	Argentine ant	ACG	340	162	89	35
481	Pseudomyrmex gracilis	Eukaryota	Invertebrates	Insects	Elongate twig ant	AT	190	91.5	65	43
482	Polistes canadensis	Eukaryota	Invertebrates	Insects	Red paper wasp	ACCCC	1018	97	70	47
483	Polistes dominula	Eukaryota	Invertebrates	Insects	European paper wasp	AAGAAT	161	97	87	55
484	Ceratosolen solmsi marchali	Eukaryota	Invertebrates	Insects	Fig wasp	ACT	2558	815	547	60
485	Copidosoma floridanum	Eukaryota	Invertebrates	Insects	;Wasp	AT	3114	100	74	41
486	Nasonia vitripennis	Eukaryota	Invertebrates	Insects	Parasitic wasp	ACAGCG	542	195	98	66
487	Trichogramma pretiosum	Eukaryota	Invertebrates	Insects	Nasal bird schistosome	AC	164	90	60	33
488	Microplitis demolitor	Eukaryota	Invertebrates	Insects	NA	AAC	14707	997.5	93	65
489	Diachasma alloeum	Eukaryota	Invertebrates	Insects	NA	C	14597	748.5	83.5	35
490	Fopius arisanus	Eukaryota	Invertebrates	Insects	NA	ATC	2864	86	35	18
491	Cephus cinctus	Eukaryota	Invertebrates	Insects	Wheat stem sawfly	AACCT	1977	637	81	41
492	Orussus abietinus	Eukaryota	Invertebrates	Insects	NA	AGGATC	143	93	34	19
493	Neodiprion lecontei	Eukaryota	Invertebrates	Insects	Redheaded pine sawfly	AAT	4236	97.5	60	33
494	Athalia rosae	Eukaryota	Invertebrates	Insects	Turnip sawfly	AGC	117	85	57	34
495	Megachile rotundata	Eukaryota	Invertebrates	Insects	Alfa alfa leafcutting bee	AG	3017	1120	43	21
496	Lingula anatina	Eukaryota	Invertebrates	Molluscs	NA	AACCCT	4765	182	91	62
497	Lottia gigantea	Eukaryota	Invertebrates	Molluscs	Giant owl limpet	AACG	443	119	62	23
498	Aplysia californica	Eukaryota	Invertebrates	Molluscs	California sea hare	AAT	3122	246	161	105
499	Biomphalaria glabrata	Eukaryota	Invertebrates	Molluscs	Bloofluke planrob	AAGT	664	214.5	126	81
500	Crassostrea gigas	Eukaryota	Invertebrates	Molluscs	Pacific oyster	ACTC	1624	112	81	55
501	Octopus bimaculoides	Eukaryota	Invertebrates	Molluscs	California two-spotted octopus	AATAT	250	194.5	152	108
502	Callorhinchus milii	Eukaryota	Vertebrates	Fishes	Australian ghostshark	ACG	785	375	207	43
503	Rhincodon typus	Eukaryota	Vertebrates	Fishes	Whale shark	AACCCT	15007	1969	369.5	70
504	Clupea harengus	Eukaryota	Vertebrates	Fishes	Atlantic herring	ACACAG	21170	1889	348.5	99
505	Cyprinus carpio	Eukaryota	Vertebrates	Fishes	Common carp	AT	8058	5676	1382.5	121
506	Sinocyclocheilus anshuiensis	Eukaryota	Vertebrates	Fishes	Eyeless goldenline fish	AAAG	5647	1945.5	292	74
507	Sinocyclocheilus grahami	Eukaryota	Vertebrates	Fishes	Dianchi golden-line fish	ACTC	13617	2313.5	317	91
508	Sinocyclocheilus rhinocerous	Eukaryota	Vertebrates	Fishes	Indian rhinoceros	AG	4873	1853	206	53
509	Danio rerio	Eukaryota	Vertebrates	Fishes	Zebrafish	AAGT	1506	732	519	163
510	Ictalurus punctatus	Eukaryota	Vertebrates	Fishes	Channel catfish	AT	234	138	119	88
511	Pygocentrus nattereri	Eukaryota	Vertebrates	Fishes	Red-bellied piranha	AC	282	199	194	153
512	Branchiostoma belcheri	Eukaryota	Vertebrates	Fishes	Amphioxus;Lancelet	A	3119	198	126	60
513	Branchiostoma floridae	Eukaryota	Vertebrates	Fishes	Florida lancelet	AT	419	190.5	108	50
514	Astyanax mexicanus	Eukaryota	Vertebrates	Fishes	Mexican tetra;Blind cave fish	AGAT	170	118	91	61
515	Cyprinodon variegatus	Eukaryota	Vertebrates	Fishes	Sheepshead minnow	AT	5330	130	94	82
516	Fundulus heteroclitus	Eukaryota	Vertebrates	Fishes	Mummichog;Killifish	AGAT	233	121	98	80
517	Poecilia mexicana	Eukaryota	Vertebrates	Fishes	Shortfin molly;Atlantic molly	AGAT	137	103.5	93	66
518	Poecilia reticulata	Eukaryota	Vertebrates	Fishes	Guppy	ATCC	218	172	104	91
519	Poecilia formosa	Eukaryota	Vertebrates	Fishes	Amazon molly	AGAT	144	106	93	63
520	Poecilia latipinna	Eukaryota	Vertebrates	Fishes	Sailfin molly	AGAT	146	106	95	73
521	Xiphophorus maculatus	Eukaryota	Vertebrates	Fishes	Southern platyfish	AAAC	312	188.5	139	82
522	Nothobranchius furzeri	Eukaryota	Vertebrates	Fishes	Turquoise killifish	AT	13844	578	101	86
523	Austrofundulus limnaeus	Eukaryota	Vertebrates	Fishes	Topminnow	AAAAT	4642	144	106	80
524	Kryptolebias marmoratus	Eukaryota	Vertebrates	Fishes	Mangrove rivulus;Mnagrove killfish	AT	8018	167	162	69
525	Oryzias latipes	Eukaryota	Vertebrates	Fishes	Japanese rice fish	AGAT	506	278.5	181	60
526	Haplochromis burtoni	Eukaryota	Vertebrates	Fishes	Burtonâ€™s mouthbrooder	AATAT	124	99	95	73
527	Maylandia zebra	Eukaryota	Vertebrates	Fishes	Zebra mbuna	AGAT	530	183	121	76
528	Pundamilia nyererei	Eukaryota	Vertebrates	Fishes	Victorian cichlids	AC	134	99	95	72
529	Neolamprologus brichardi	Eukaryota	Vertebrates	Fishes	Fairy cichlid	AAT	104	96	80	50
530	Oreochromis niloticus	Eukaryota	Vertebrates	Fishes	Nile tilapia	AAG	286	147.5	100	65
531	Stegastes partitus	Eukaryota	Vertebrates	Fishes	bicolor damselfish	AGAT	143	99	90	58
532	Labrus bergylta	Eukaryota	Vertebrates	Fishes	Ballan wrasse	A	13074	349.5	219	127
533	Larimichthys crocea	Eukaryota	Vertebrates	Fishes	Large yellow croaker	ACAG	14212	624.5	208	74
534	Takifugu rubripes	Eukaryota	Vertebrates	Fishes	Japanese pufferfish	ACAG	437	179	126	71
535	Notothenia coriiceps	Eukaryota	Vertebrates	Fishes	Black rockcod	ACGT	485	263	173	120
536	Lates calcarifer	Eukaryota	Vertebrates	Fishes	Barramundi	AACCCT	2228	225	85	58
537	Monopterus albus	Eukaryota	Vertebrates	Fishes	Asian swamp eel	AAGAT	1751	127	73	46
538	Hippocampus comes	Eukaryota	Vertebrates	Fishes	Tiger tail seahorse	AT	5038	275	111	76
539	Esox lucius	Eukaryota	Vertebrates	Fishes	Northern pike	AT	3288	191	86	46
540	Oncorhynchus kisutch	Eukaryota	Vertebrates	Fishes	Coho salmon	AT	7362	313	187	115
541	Salmo salar	Eukaryota	Vertebrates	Fishes	Atlantic salmon	AACCCT	1229	427	227	152
542	Scleropages formosus	Eukaryota	Vertebrates	Fishes	Asian arowana;Asian bonytongue	AC	800	223.5	86	55
543	Lepisosteus oculatus	Eukaryota	Vertebrates	Fishes	Spotted gar	AACACC	162	95	69	41
544	Latimeria chalumnae	Eukaryota	Vertebrates	Fishes	West Indian Ocean coelacanth	AAGGAG	166	91.5	72	55
545	Cynoglossus semilaevis	Eukaryota	Vertebrates	Fishes	Tongue sole	AAAT	4271	448.5	153	47
546	Paralichthys olivaceus	Eukaryota	Vertebrates	Fishes	Olive flounder;Bastard halibut;Hippoglossus	AC	145	106.5	89	61
547	Alligator mississippiensis	Eukaryota	Vertebrates	Reptiles	American alligator	ACATG	217	147.5	96	49
548	Alligator sinensis	Eukaryota	Vertebrates	Reptiles	Chinese alligator	AT	3439	798	98	48
549	Crocodylus porosus	Eukaryota	Vertebrates	Reptiles	Saltwater crocodile	ACAG	136	95	71	42
550	Gavialis gangeticus	Eukaryota	Vertebrates	Reptiles	Indian gharial	AT	945	336	91	50
551	Chelonia mydas	Eukaryota	Vertebrates	Reptiles	Green sea turtle	AGAT	7849	800	104	38
552	Chrysemys picta bellii	Eukaryota	Vertebrates	Reptiles	Western painted turtle	AAGGT	582	120	90	63
553	Pelodiscus sinensis	Eukaryota	Vertebrates	Reptiles	Chinese softshell turtle	AAAG	4833	888.5	516	64
554	Anolis carolinensis	Eukaryota	Vertebrates	Reptiles	Carolina anole;Green anole	AACCCT	298	119	89	67
555	Protobothrops mucrosquamatus	Eukaryota	Vertebrates	Reptiles	Taiwan habu	AGAT	277	197	194	134
556	Thamnophis sirtalis	Eukaryota	Vertebrates	Reptiles	Common garter snake;Eastern garter snake	AGAT	207	135.5	98	83
557	Python bivittatus	Eukaryota	Vertebrates	Reptiles	Burmese python	AGAT	1046	433	271	86
558	Gekko japonicus	Eukaryota	Vertebrates	Reptiles	Gekko;Schlegelâ€™s Japanese Gecko	AG	4959	568	213.5	93
559	Acanthisitta chloris	Eukaryota	Vertebrates	Birds	Rifleman	AAAAG	1055	799	249	33
560	Corvus brachyrhynchos	Eukaryota	Vertebrates	Birds	American crow	AAAAGG	11831	616	153	44
561	Corvus cornix cornix	Eukaryota	Vertebrates	Birds	Hooded crow	AAGG	8306	1413	255	43
562	Ficedula albicollis	Eukaryota	Vertebrates	Birds	Collared flycatcher	C	5837	4855.5	4094.5	1837
563	Sturnus vulgaris	Eukaryota	Vertebrates	Birds	Common starling	AGAGG	343	121.5	94	66
564	Parus major	Eukaryota	Vertebrates	Birds	Great tit	AGGGG	232	105	96	62
565	Pseudopodoces humilis	Eukaryota	Vertebrates	Birds	Tibetian ground jay	AGAGG	4952	432	146	58
566	Geospiza fortis	Eukaryota	Vertebrates	Birds	Medium ground finch	AATAT	18099	874.5	270	70
567	Zonotrichia albicollis	Eukaryota	Vertebrates	Birds	White-throated sparrow	AAAAAG	200	128	97	66
568	Serinus canaria	Eukaryota	Vertebrates	Birds	Atlantic canary;Island canary	ACCT	1135	431	192.5	94
569	Taeniopygia guttata	Eukaryota	Vertebrates	Birds	Zebra finch	AACCCT	379	264	180	69
570	Lepidothrix coronata	Eukaryota	Vertebrates	Birds	Blue-crowned manakin	AAGAAT	152	96	79	38
571	Manacus vitellinus	Eukaryota	Vertebrates	Birds	Golden-collared manakin	AACCCT	948	295	103	51
572	Apaloderma vittatum	Eukaryota	Vertebrates	Birds	Bar-tailed trogon	AAAGG	634	406	161	31
573	Picoides pubescens	Eukaryota	Vertebrates	Birds	Downy woodpecker	AAATAG	4234	823	279	90
574	Colius striatus	Eukaryota	Vertebrates	Birds	Speckled mousebird	AAGG	632	318	132	35
575	Buceros rhinoceros silvestris	Eukaryota	Vertebrates	Birds	Rhinoceros hornbill	AAGAG	691	488	115	44
576	Leptosomus discolor	Eukaryota	Vertebrates	Birds	Cuckoo roller;Madagascar cuckoo roller	AAGAG	567	322	105.5	31
577	Merops nubicus	Eukaryota	Vertebrates	Birds	Northern carmine bee-eater	AAAGG	995	785.5	175.5	39
578	Melopsittacus undulatus	Eukaryota	Vertebrates	Birds	Budgerigar	AG	435	164.5	69	26
579	Nestor notabilis	Eukaryota	Vertebrates	Birds	Kea	AAGAG	644	249.5	73	30
580	Tyto alba	Eukaryota	Vertebrates	Birds	Barn owl	AACCCT	1445	552	106	38
581	Aptenodytes forsteri	Eukaryota	Vertebrates	Birds	Emperor penguin	AAAG	9743	777.5	280	44
582	Pygoscelis adeliae	Eukaryota	Vertebrates	Birds	Adelie penguin	AAAAG	5974	832.5	202	41
583	Fulmarus glacialis	Eukaryota	Vertebrates	Birds	Northern fulmar	AAAAG	994	679	68	29
584	Gavia stellata	Eukaryota	Vertebrates	Birds	Red-throated loon;Red-throated diver	AAGAG	655	296.5	82	28
585	Calidris pugnax	Eukaryota	Vertebrates	Birds	Ruff	AAAG	2507	391.5	122	42
586	Charadrius vociferus	Eukaryota	Vertebrates	Birds	Killdeer	AAGAG	8044	577	148	38
587	Balearica regulorum gibbericeps	Eukaryota	Vertebrates	Birds	Grey crowned crane	AAAGG	636	373	160	35
588	Chlamydotis macqueenii	Eukaryota	Vertebrates	Birds	Macqueenâ€™s bustard	AAAAG	454	223	67	29
589	Eurypyga helias	Eukaryota	Vertebrates	Birds	Sunbittern	AAAAG	698	332.5	93	26
590	Mesitornis unicolor	Eukaryota	Vertebrates	Birds	Brown mesite;Brown roatelo	AAGG	640	273.5	102.5	36
591	Cariama cristata	Eukaryota	Vertebrates	Birds	Red-legged seriema	AAAGG	589	298	93	29
592	Egretta garzetta	Eukaryota	Vertebrates	Birds	Little egret	AAAGG	1900	375	83	35
593	Nipponia nippon	Eukaryota	Vertebrates	Birds	Crested ibis	AGATG	3529	493	167.5	49
594	Pelecanus crispus	Eukaryota	Vertebrates	Birds	Dalmatian pelican	AAAAG	739	394	136	36
595	Phalacrocorax carbo	Eukaryota	Vertebrates	Birds	Great cormorant;Cormorant	AAAAG	980	498	215	29
596	Phaethon lepturus	Eukaryota	Vertebrates	Birds	White-tailed tropicbird	AAAGAG	1261	810.5	201.5	32
597	Pterocles gutturalis	Eukaryota	Vertebrates	Birds	Yellow-throated sandgrouse	ATCC	615	201.5	62	34
598	Aquila chrysaetos canadensis	Eukaryota	Vertebrates	Birds	Golden Eagle	AAAAAG	164	97	70	38
599	Haliaeetus albicilla	Eukaryota	Vertebrates	Birds	White-tailed sea-eagle	AAAAG	927	494	57	28
600	Haliaeetus leucocephalus	Eukaryota	Vertebrates	Birds	Bald eagle	AAGAG	238	93	60	30
601	Falco cherrug	Eukaryota	Vertebrates	Birds	Saker falcon	ACGGC	4113	576.5	115.5	35
602	Falco peregrinus	Eukaryota	Vertebrates	Birds	Peregrine falcon;Peale's falcon	AAGAG	8198	584.5	100	34
603	Columba livia	Eukaryota	Vertebrates	Birds	Rock dove;Domestic pigeon	AAAGG	7946	940.5	280	55
604	Opisthocomus hoazin	Eukaryota	Vertebrates	Birds	Hoatzin	AAGAG	8568	648.5	171.5	36
605	Cuculus canorus	Eukaryota	Vertebrates	Birds	Common cuckoo	AAGAG	9065	481	152	44
606	Tauraco erythrolophus	Eukaryota	Vertebrates	Birds	Red-crested turaco	AAAAG	833	403.5	149	33
607	Antrostomus carolinensis	Eukaryota	Vertebrates	Birds	Chuck-will's-widow	AAAGAG	1034	831	238.5	46
608	Calypte anna	Eukaryota	Vertebrates	Birds	Anna's hummingbird	AAG	4123	679.5	262.5	60
609	Chaetura pelagica	Eukaryota	Vertebrates	Birds	Chimney swift	AAGAG	11331	1111.5	336.5	55
610	Anas platyrhynchos	Eukaryota	Vertebrates	Birds	Mallard	AAAGG	9814	611.5	247	101
611	Anser cygnoides domesticus	Eukaryota	Vertebrates	Birds	Swan Goose;Goose;Domestic Goose	AC	8051	2547	897.5	95
612	Coturnix japonica	Eukaryota	Vertebrates	Birds	Japanese quail	AAAAT	8092	130.5	97	77
613	Gallus gallus	Eukaryota	Vertebrates	Birds	Red junglefowl;Junglefowl;Chicken	AACCCT	2446	503	225	119
614	Meleagris gallopavo	Eukaryota	Vertebrates	Birds	Wild turkey;Turkey;Common Turkey	AGG	560	416	179	48
615	Apteryx australis mantelli	Eukaryota	Vertebrates	Birds	Brown Kiwi	ACCCG	2649	660	70	38
616	Struthio camelus australis	Eukaryota	Vertebrates	Birds	Southern ostrich	AAAGG	1966	538	86	35
617	Tinamus guttatus	Eukaryota	Vertebrates	Birds	White-throated tinamou	AG	3902	352	123.5	50
618	Acinonyx jubatus	Eukaryota	Vertebrates	Mammals	Cheetah;Tanzanian cheetah;Asiatic cheetah	AG	3617	842.5	565	68
619	Felis catus	Eukaryota	Vertebrates	Mammals	Cat	ACGT	1342	339.5	104	71
620	Panthera pardus	Eukaryota	Vertebrates	Mammals	Leopard;Indian leopard;African leopard	AG	4318	1134.5	353	74
621	Panthera tigris altaica	Eukaryota	Vertebrates	Mammals	Siberian Tiger	AAAAAG	4781	446.5	173.5	67
622	Ailuropoda melanoleuca	Eukaryota	Vertebrates	Mammals	Giant panda	AAGAG	4882	320	106	42
623	Ursus maritimus	Eukaryota	Vertebrates	Mammals	Polar bear	AAAAG	3769	634	179	64
624	Leptonychotes weddellii	Eukaryota	Vertebrates	Mammals	Weddell seal	AAAT	23202	91	76	55
625	Odobenus rosmarus divergens	Eukaryota	Vertebrates	Mammals	Pacific walrus	AC	31568	99	76	57
626	Mustela putorius furo	Eukaryota	Vertebrates	Mammals	European domestic ferret	AGG	112	80	62	44
627	Canis lupus familiaris	Eukaryota	Vertebrates	Mammals	Dog	AAAT	439	163.5	105	77
628	Manis javanica	Eukaryota	Vertebrates	Mammals	Sunda pangolin;Malayan pangolin	AAAG	3953	111	74	54
629	Ceratotherium simum simum	Eukaryota	Vertebrates	Mammals	White rhinoceros;Southern white rhinoceros	AGATAT	144	95	69	48
630	Equus asinus	Eukaryota	Vertebrates	Mammals	Donkey	C	4646	710	66	40
631	Equus caballus	Eukaryota	Vertebrates	Mammals	Horse	AT	364	84	52	39
632	Equus przewalskii	Eukaryota	Vertebrates	Mammals	Przewalski horses	ATCC	2029	478.5	280.5	39
633	Balaenoptera acutorostrata scammoni	Eukaryota	Vertebrates	Mammals	Minke Whale	AT	8733	329.5	164	52
634	Lipotes vexillifer	Eukaryota	Vertebrates	Mammals	Yangtze river dolphin	C	11608	296	105	59
635	Orcinus orca	Eukaryota	Vertebrates	Mammals	Killer whale	AC	35597	98	79	56
636	Tursiops truncatus	Eukaryota	Vertebrates	Mammals	Atlantic bottle-nose dolphin	AC	194	144	95	54
637	Physeter catodon	Eukaryota	Vertebrates	Mammals	Sperm whale	AGAGG	306	105	82	58
638	Bison bison bison	Eukaryota	Vertebrates	Mammals	Bison	ACGT	633	106	49	38
639	Bos indicus	Eukaryota	Vertebrates	Mammals	Zebu	AT	166	76.5	55	44
640	Bos taurus	Eukaryota	Vertebrates	Mammals	Cattle;Taurine cattle	AACCCT	426	97	57	45
641	Bos mutus	Eukaryota	Vertebrates	Mammals	Domestic yak;Wild yak	ACT	3099	611	151	39
642	Bubalus bubalis	Eukaryota	Vertebrates	Mammals	Domestic Water buffalo	ACGT	767	99	51	40
643	Capra hircus	Eukaryota	Vertebrates	Mammals	Goat	AACCCT	2625	248	103	51
644	Ovis aries	Eukaryota	Vertebrates	Mammals	Sheep	A	14774	352.5	126	49
645	Ovis aries musimon	Eukaryota	Vertebrates	Mammals	European mouflon	AGC	117	91	67	49
646	Pantholops hodgsonii	Eukaryota	Vertebrates	Mammals	Tibetan antelope	AG	1035	603	311	43
647	Sus scrofa	Eukaryota	Vertebrates	Mammals	Domestic pig	AT	702	238	93	65
648	Camelus bactrianus	Eukaryota	Vertebrates	Mammals	Bactrian camel;Wild Bactrian camel	AAG	4828	232	88	56
649	Camelus ferus	Eukaryota	Vertebrates	Mammals	Wild Bactrian camel;Bactrian camel	AAAGG	3289	715.5	493	63
650	Camelus dromedarius	Eukaryota	Vertebrates	Mammals	Arabian camel	AAAG	4494	417.5	217	83
651	Vicugna pacos	Eukaryota	Vertebrates	Mammals	Alpaca	AAG	400	132.5	90	56
652	Eptesicus fuscus	Eukaryota	Vertebrates	Mammals	Big brown bat	AAAT	8922	107.5	85	62
653	Myotis brandtii	Eukaryota	Vertebrates	Mammals	Brandt's bat	AAGGAG	9131	1097.5	528	65
654	Myotis lucifugus	Eukaryota	Vertebrates	Mammals	Little brown bat	AAAAT	289	143	93	68
655	Myotis davidii	Eukaryota	Vertebrates	Mammals	Davidâ€™s myotis	AG	4630	342	123	58
656	Miniopterus natalensis	Eukaryota	Vertebrates	Mammals	Natal long-fingered bat	AAATAT	1886	783.5	102	67
657	Hipposideros armiger	Eukaryota	Vertebrates	Mammals	Great roundleaf bat	AAAG	147	110	90	66
658	Rhinolophus sinicus	Eukaryota	Vertebrates	Mammals	Chinese rufous horseshoe bat	AAATAT	102	81	71	54
659	Pteropus alecto	Eukaryota	Vertebrates	Mammals	Black flying fox	AG	4892	580	139	64
660	Pteropus vampyrus	Eukaryota	Vertebrates	Mammals	Large flying fox	AAT	4151	137	95	65
661	Rousettus aegyptiacus	Eukaryota	Vertebrates	Mammals	Egyptian fruit bat	AAGGC	313	144	101	71
662	Condylura cristata	Eukaryota	Vertebrates	Mammals	Star-nosed mole	AT	1318	100	90	54
663	Erinaceus europaeus	Eukaryota	Vertebrates	Mammals	Western European hedgehog	AGAGGG	983	136	99	81
664	Sorex araneus	Eukaryota	Vertebrates	Mammals	Common shrew;Eurasian common shrew	AG	906	131	99	92
665	Aotus nancymaae	Eukaryota	Vertebrates	Mammals	Nancy Ma's night monkey	AAAAT	2545	87	67	48
666	Callithrix jacchus	Eukaryota	Vertebrates	Mammals	Common marmoset;White-tufted-ear marmoset	AACCCT	640	241	85	63
667	Cebus capucinus imitator	Eukaryota	Vertebrates	Mammals	White-faced capuchin	AGGG	192	119	94	72
668	Saimiri boliviensis boliviensis	Eukaryota	Vertebrates	Mammals	Black-capped squirrel monkey;Squirrel monkey;Bolivian squirrel monkey	AAGGAG	161	95	77	54
669	Cercocebus atys	Eukaryota	Vertebrates	Mammals	Sooty mangabey	AAAT	51921	138.5	89	63
670	Mandrillus leucophaeus	Eukaryota	Vertebrates	Mammals	Drill	AAAT	6337	118	90	66
671	Papio anubis	Eukaryota	Vertebrates	Mammals	Olive baboon	AT	603	134	100	75
672	Macaca fascicularis	Eukaryota	Vertebrates	Mammals	Crab-eating macaque	AAGG	3126	485.5	127	83
673	Macaca mulatta	Eukaryota	Vertebrates	Mammals	Rhesus macaque	AACCCT	1130	179	104.5	77
674	Macaca nemestrina	Eukaryota	Vertebrates	Mammals	Southern pig-tailed macaque;Pig-tailed macaque	AAGG	1362	136	90	65
675	Chlorocebus sabaeus	Eukaryota	Vertebrates	Mammals	Green monkey	AC	351	150.5	97	73
676	Colobus angolensis palliatus	Eukaryota	Vertebrates	Mammals	Angolan back-white colobus	AAGG	8120	124.5	92	67
677	Rhinopithecus bieti	Eukaryota	Vertebrates	Mammals	Black snub-nosed monkey	AAGGAG	3918	475.5	98	70
678	Rhinopithecus roxellana	Eukaryota	Vertebrates	Mammals	Golden snub-nosed monkey	AAAGG	8214	343	99	78
679	Gorilla gorilla gorilla	Eukaryota	Vertebrates	Mammals	Gorilla	AATGG	651	322.5	122	76
680	Homo sapiens	Eukaryota	Vertebrates	Mammals	Human	AACCCT	1103	170	83	62
681	Pan paniscus	Eukaryota	Vertebrates	Mammals	Pygmy chimpanzee	AGG	364	166	86	56
682	Pan troglodytes	Eukaryota	Vertebrates	Mammals	Common chimpanzee;Eastern chimpanzee	C	640	189	127	66
683	Pongo abelii	Eukaryota	Vertebrates	Mammals	Sumatran orangutan	AACCCT	366	162	96	54
684	Nomascus leucogenys	Eukaryota	Vertebrates	Mammals	Northern white-cheeked gibbon	AACCCT	702	103	78	59
685	Carlito syrichta	Eukaryota	Vertebrates	Mammals	Philippine tarsier;Tarsier	ACACGT	366	163	94	73
686	Microcebus murinus	Eukaryota	Vertebrates	Mammals	Gray mouse lemur;Lesser mouse lemur	AAGG	5284	152	98	69
687	Propithecus coquereli	Eukaryota	Vertebrates	Mammals	Coquerel's sifaka	AT	160	90	69	47
688	Otolemur garnettii	Eukaryota	Vertebrates	Mammals	Northern greater galago;Small-eared galago	AAGGAG	109	91	74	42
689	Galeopterus variegatus	Eukaryota	Vertebrates	Mammals	Sunda flying lemur;Malayan flying lemur	AAT	4169	1028.5	414	79
690	Castor canadensis	Eukaryota	Vertebrates	Mammals	North American beaver;Beaver	AACCCT	5348	2191	352.5	70
691	Dipodomys ordii	Eukaryota	Vertebrates	Mammals	Ord's kangaroo rat	AGGG	348	173	129	99
692	Cricetulus griseus	Eukaryota	Vertebrates	Mammals	Chinese hamster	AGCCTG	5663	1275	551	83
693	Mesocricetus auratus	Eukaryota	Vertebrates	Mammals	Golden hamster	AGGG	281	119.5	95	75
694	Microtus ochrogaster	Eukaryota	Vertebrates	Mammals	Prairie vole	AAGG	426	126	95	77
695	Peromyscus maniculatus bairdii	Eukaryota	Vertebrates	Mammals	Deer mouse	AAAC	2821	141.5	103	87
696	Mus musculus	Eukaryota	Vertebrates	Mammals	House mouse	AGGC	2473	402	186.5	107
697	Rattus norvegicus	Eukaryota	Vertebrates	Mammals	Brown rat;Rat	A	844	258	136	83
698	Nannospalax galili	Eukaryota	Vertebrates	Mammals	Norhtern Israeli blind subterranean mole	AGAT	4926	650.5	303	75
699	Jaculus jaculus	Eukaryota	Vertebrates	Mammals	lesser Egyptian jerboa	AAAT	6765	125	96	71
700	Ictidomys tridecemlineatus	Eukaryota	Vertebrates	Mammals	Thirteen-lined ground squirrel	AAGGAG	164	107.5	87	64
701	Marmota marmota marmota	Eukaryota	Vertebrates	Mammals	Alpine marmot	AAAG	8896	2269	142	59
702	Tupaia chinensis	Eukaryota	Vertebrates	Mammals	Chinese tree shrew	AT	17324	1193	235	82
703	Cavia porcellus	Eukaryota	Vertebrates	Mammals	Guinea pig	AT	231	105	83	63
704	Chinchilla lanigera	Eukaryota	Vertebrates	Mammals	Long-tailed chinchilla	AAGGG	253	102	88	66
705	Octodon degus	Eukaryota	Vertebrates	Mammals	Degu	AATAT	8652	123	96	81
706	Fukomys damarensis	Eukaryota	Vertebrates	Mammals	Damaraland mole-rat	AG	1852	459.5	127	65
707	Heterocephalus glaber	Eukaryota	Vertebrates	Mammals	Naked mole-rat	AT	3738	99.5	84	58
708	Ochotona princeps	Eukaryota	Vertebrates	Mammals	Southern american pika	AAGGC	13371	95	78	55
709	Oryctolagus cuniculus	Eukaryota	Vertebrates	Mammals	European rabbit	AAAGG	336	184	109	69
710	Chrysochloris asiatica	Eukaryota	Vertebrates	Mammals	Cape golden mole	AATAT	4470	98	80	56
711	Echinops telfairi	Eukaryota	Vertebrates	Mammals	Lesser hedgehog tenrec	ATCC	172	101	79	57
712	Elephantulus edwardii	Eukaryota	Vertebrates	Mammals	Cape long-eared elephant shrew	AAGG	4030	119	93	64
713	Orycteropus afer afer	Eukaryota	Vertebrates	Mammals	Aardvark	ACGCAT	202	93	67	45
714	Loxodonta africana	Eukaryota	Vertebrates	Mammals	African Bush Elephant	AATAT	532	217	120	59
715	Trichechus manatus latirostris	Eukaryota	Vertebrates	Mammals	West Indian manatee;Florida manatee	ACGCAT	432	85	63	44
716	Dasypus novemcinctus	Eukaryota	Vertebrates	Mammals	Nine-banded armadillo	AAAAT	581	214	115	63
717	Monodelphis domestica	Eukaryota	Vertebrates	Mammals	Gray short-tailed opossum	AAGGAG	617	314.5	238	171
718	Sarcophilus harrisii	Eukaryota	Vertebrates	Mammals	Tasmanian devil	AG	153	114	96	80
719	Ornithorhynchus anatinus	Eukaryota	Vertebrates	Mammals	Duckbill platypus	AT	549	181	106	51
